# Supplementary material for: Nitrous oxide activation by picoline-derived Ni–CNP hydrides
Source: Royal Society of Chemistry journal article supplement (doi:10.1039/d3cc05455a), 2024-01-01
Supplement: d3cc05455a2.pdf [file d3cc05455a2.pdf]

*Electronic Supplementary Information*

**Nitrous oxide activation by picoline-derived Ni-CNP hydrides**

José Bermejo,<sup>a</sup> Isabel Ortega-Lepe,<sup>a</sup> Laura L. Santos,<sup>a</sup> Nuria Rendón,<sup>a</sup> Joaquín López-Serrano,<sup>a</sup> Eleuterio Álvarez<sup>a</sup> and Andrés Suárez<sup>\*a</sup>

<sup>a</sup>Instituto de Investigaciones Químicas (IIQ), Departamento de Química Inorgánica, and Centro de Innovación en Química Avanzada (ORFEO-CINQA), CSIC-Universidad de Sevilla. Avda. Américo Vespucio 49, 41092, Sevilla, Spain.

E-mail: andres.suarez@iiq.csic.es

## Table of Contents

|                                                                                      |    |
|--------------------------------------------------------------------------------------|----|
| 1. Synthetic procedures and analytical data.....                                     | 3  |
| 1.1. General procedures.....                                                         | 3  |
| 1.2. Synthesis and characterisation of imidazolium salts <b>1</b> .....              | 4  |
| 1.3. Synthesis and characterisation of nickel complexes <b>2</b> .....               | 8  |
| 1.4. Synthesis and characterisation of nickel complexes <b>3</b> .....               | 10 |
| 1.5. Synthesis and characterisation of nickel complexes <b>4</b> .....               | 12 |
| 1.6. Synthesis and characterisation of nickel complexes <b>5</b> .....               | 14 |
| 1.7. Representative procedure for N <sub>2</sub> O reduction with pinacolborane..... | 16 |
| 2. X-Ray structure analysis of complexes <b>3a</b> and <b>5b</b> .....               | 19 |
| 3. Selected NMR spectra of nickel complexes.....                                     | 24 |
| 4. DFT calculations.....                                                             | 39 |

## 1. Synthetic procedures and analytical data

### 1.1. General procedures

All reactions and manipulations were performed under nitrogen or argon, either in a Braun Labmaster 100 glovebox or using standard Schlenk-type techniques. All solvents were distilled under nitrogen with the following desiccants: sodium-benzophenone-ketyl for diethyl ether (Et<sub>2</sub>O) and tetrahydrofuran (THF); sodium for toluene; CaH<sub>2</sub> for dichloromethane and acetonitrile (CH<sub>2</sub>Cl<sub>2</sub>, CH<sub>3</sub>CN); and NaOMe for methanol (MeOH). All other reagents were purchased from commercial suppliers and used as received. NMR spectra were obtained on Bruker AVANCE NEO-300, AVANCE NEO-400, AVANCE III-400R and AVANCE NEO-500 spectrometers. <sup>31</sup>P{<sup>1</sup>H} and <sup>11</sup>B{<sup>1</sup>H} NMR shifts were referenced to external 85% H<sub>3</sub>PO<sub>4</sub> and BF<sub>3</sub>·Et<sub>2</sub>O, respectively, while <sup>13</sup>C{<sup>1</sup>H} and <sup>1</sup>H shifts were referenced to the residual signals of deuterated solvents. All data are reported in ppm downfield from Me<sub>4</sub>Si. All NMR measurements were carried out at 25 °C, unless otherwise stated. NMR signal assignments were confirmed by two dimensional (2D) NMR spectroscopy, including <sup>1</sup>H-<sup>1</sup>H correlated spectroscopy (COSY), <sup>1</sup>H-<sup>1</sup>H nuclear Overhauser effect spectroscopy (NOESY), <sup>1</sup>H-<sup>13</sup>C heteronuclear single quantum coherence (HSQC), and <sup>1</sup>H-<sup>13</sup>C heteronuclear multiple bond correlation (HMBC), for all of the complexes. HRMS data were obtained on a JEOL JMS-SX 102A mass spectrometer at the Instrumental Services of Universidad de Sevilla (CITIUS). Elemental analyses were run by the Analytical Service of the Instituto de Investigaciones Químicas in a Leco TrueSpec CHN elemental analyser. IR spectra were acquired on a Thermo Scientific Nicolet iS5 iD7 ATR instrument.

## 1.2. Synthesis and characterisation of imidazolium salts 1

Imidazolium salts **1a-b** were prepared following the synthetic methodology previously reported by Danopoulos, Braunstein *et al.*<sup>[1]</sup>

### Synthesis of the imidazolium salt 1a

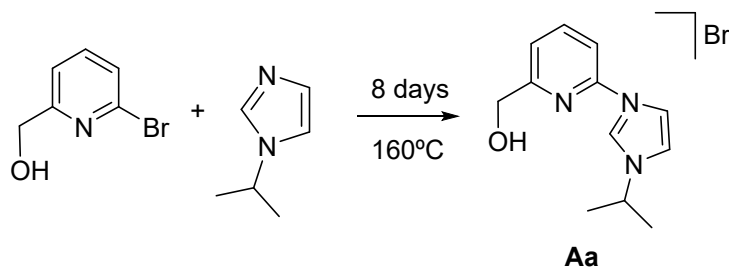

A mixture of 6-bromo-2-(hydroxymethyl)pyridine (1.50 g, 8.0 mmol) and 1-isopropyl-1*H*-imidazole (0.881 g, 8.0 mmol) was heated to 160 °C for 8 days. The resulting solid was washed with Et<sub>2</sub>O (3 x 20 mL). White solid (1.20 g, 50%).

**<sup>1</sup>H NMR** (400 MHz, CD<sub>3</sub>OD): δ 9.98 (dd, <sup>4</sup>J<sub>HH</sub> = 1.6 Hz, <sup>4</sup>J<sub>HH</sub> = 1.6 Hz, 1H, H arom Imid), 8.46 (br s, 1H, H arom Imid), 8.16 (dd, <sup>3</sup>J<sub>HH</sub> = 8.4 Hz, <sup>3</sup>J<sub>HH</sub> = 7.8 Hz, 1H, H arom Py), 8.01 (br s, 1H, H arom Imid), 7.86 (d, <sup>3</sup>J<sub>HH</sub> = 8.4 Hz, 1H, H arom Py), 7.72 (d, <sup>3</sup>J<sub>HH</sub> = 7.8 Hz, 1H, H arom Py), 4.86 (hept, <sup>3</sup>J<sub>HH</sub> = 6.6 Hz, 1H, CH(CH<sub>3</sub>)<sub>2</sub>), 4.81 (s, 2H, CH<sub>2</sub>O), 1.70 (d, <sup>3</sup>J<sub>HH</sub> = 6.6 Hz, 6H, CH(CH<sub>3</sub>)<sub>2</sub>).

**<sup>13</sup>C{<sup>1</sup>H} NMR** (101 MHz, CD<sub>3</sub>OD): δ 164.4 (C<sub>q</sub> arom), 148.2 (C<sub>q</sub> arom), 143.0 (CH arom), 139.4 (CH arom), 123.7 (CH arom), 123.6 (CH arom), 121.7 (CH arom), 113.9 (CH arom), 66.1 (CH<sub>2</sub>O), 56.3 (CH(CH<sub>3</sub>)<sub>2</sub>), 23.7 (2 CH(CH<sub>3</sub>)<sub>2</sub>).

**HRMS** (ESI): *m/z* calcd for C<sub>12</sub>H<sub>16</sub>N<sub>3</sub>O [(*M*-Br)<sup>+</sup>]: 218.1293; found: 218.1286.

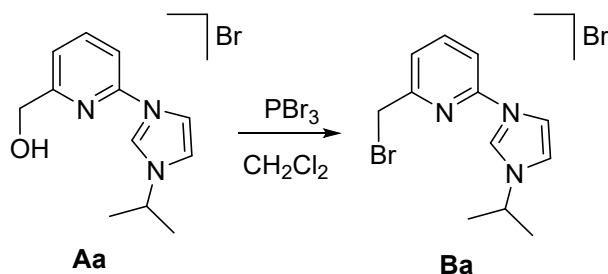

To a solution of **Aa** (1.19 g, 4.0 mmol) in CH<sub>2</sub>Cl<sub>2</sub> (30 mL) cooled to 0 °C was added PBr<sub>3</sub> (0.38 mL, 4.0 mmol) dropwise. The resulting solution was stirred at room temperature for 24 h. The reaction mixture was treated with a saturated aqueous solution of Na<sub>2</sub>CO<sub>3</sub>

<sup>1</sup> T. Simler, A. A. Danopoulos and P. Braunstein, *Chem. Commun.*, 2015, **51**, 10699–10702.

until pH = 5-6. The aqueous phase was separated, and extracted with CH<sub>2</sub>Cl<sub>2</sub> (4 x 20 mL). Organic phases were combined, and dried over Na<sub>2</sub>SO<sub>4</sub>. The desired product was obtained after evaporation of the solvent as a white solid (0.649 g, 45%).

**<sup>1</sup>H NMR** (500 MHz, CDCl<sub>3</sub>): δ 11.66 (dd, <sup>4</sup>J<sub>HH</sub> = 1.2 Hz, <sup>4</sup>J<sub>HH</sub> = 1.6 Hz, 1H, H arom Imid), 8.68 (d, <sup>3</sup>J<sub>HH</sub> = 8.2 Hz, 1H, H arom Py), 8.37 (dd, <sup>2</sup>J<sub>HH</sub> = 1.9 Hz, <sup>4</sup>J<sub>HH</sub> = 1.6 Hz, 1H, H arom Imid), 8.02 (dd, <sup>3</sup>J<sub>HH</sub> = 8.2 Hz, <sup>3</sup>J<sub>HH</sub> = 8.2 Hz, 1H, H arom Py), 7.68 (dd, <sup>2</sup>J<sub>HH</sub> = 1.9 Hz, <sup>4</sup>J<sub>HH</sub> = 1.2 Hz, 1H, H arom Imid), 7.55 (d, <sup>3</sup>J<sub>HH</sub> = 8.2 Hz, 1H, H arom Py), 5.17 (hept, 1H, <sup>3</sup>J<sub>HH</sub> = 6.6 Hz, CH(CH<sub>3</sub>)<sub>2</sub>), 4.51 (s, 2H, CH<sub>2</sub>Br), 1.72 (d, 6H, <sup>3</sup>J<sub>HH</sub> = 6.6 Hz, CH(CH<sub>3</sub>)<sub>2</sub>).

**<sup>13</sup>C{<sup>1</sup>H} NMR** (126 MHz, CDCl<sub>3</sub>): δ 157.0 (CH arom), 145.8 (C<sub>q</sub> arom), 142.1 (CH arom), 135.2 (C<sub>q</sub> arom), 125.0 (CH arom), 120.4 (CH arom), 119.4 (CH arom), 114.9 (CH arom), 54.6 (CH(CH<sub>3</sub>)<sub>2</sub>), 32.3 (CH<sub>2</sub>Br), 23.5 (CH(CH<sub>3</sub>)<sub>2</sub>).

**HRMS** (ESI): *m/z* calcd for C<sub>12</sub>H<sub>15</sub>BrN<sub>3</sub> [(*M*-Br)<sup>+</sup>]: 280.0449; found: 280.0446.

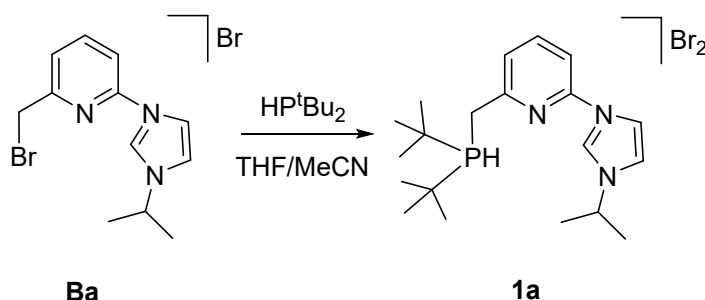

To a solution of **Ba** (0.326 g, 0.90 mmol) in THF (3 mL) / MeCN (9 mL) was added HP<sup>t</sup>Bu<sub>2</sub> (0.25 mL, 1.4 mmol) dropwise. The resulting solution was stirred at room temperature for 3 days. Volatiles were removed under vacuum, and the resulting solid was washed with cold THF (2 x 5 mL) to give a yellow solid (0.308 g, 67%).

**<sup>1</sup>H NMR** (400 MHz, CD<sub>2</sub>Cl<sub>2</sub>): δ 11.65 (s, 1H, H arom Imid), 9.54 (dt, <sup>1</sup>J<sub>HP</sub> = 504 Hz, <sup>3</sup>J<sub>HH</sub> = 5.1 Hz, 1H, <sup>t</sup>Bu<sub>2</sub>PH), 8.99 (s, 1H, H arom Imid), 8.34 (d, <sup>3</sup>J<sub>HH</sub> = 8.0 Hz, 1H, H arom Py), 8.15 (d, <sup>3</sup>J<sub>HH</sub> = 7.4 Hz, 1H, H arom Py), 8.05 (dd, <sup>3</sup>J<sub>HH</sub> = 8.04, <sup>3</sup>J<sub>HH</sub> = 7.4 Hz, 1H, H arom Py), 7.68 (s, 1H, H arom imid), 5.41 (hept, <sup>3</sup>J<sub>HH</sub> = 6.7 Hz, 1H, CH(CH<sub>3</sub>)<sub>2</sub>), 4.42 (dd, <sup>2</sup>J<sub>HP</sub> = 13.1 Hz, <sup>3</sup>J<sub>HH</sub> = 5.1 Hz, 2H, CH<sub>2</sub>P), 1.72 (d, <sup>3</sup>J<sub>HH</sub> = 6.7 Hz, 6H, 2 CH(CH<sub>3</sub>)<sub>2</sub>), 1.62 (d, <sup>3</sup>J<sub>HP</sub> = 16.4 Hz, 18H, 2 C(CH<sub>3</sub>)<sub>3</sub>).

**<sup>13</sup>C{<sup>1</sup>H} NMR** (101 MHz, CD<sub>2</sub>Cl<sub>2</sub>): δ 153.7 (d, J<sub>CP</sub> = 11 Hz, C<sub>q</sub> arom), 146.9 (C<sub>q</sub> arom), 142.8 (CH arom), 135.9 (CH arom), 127.2 (d, J<sub>CP</sub> = 7 Hz, CH arom), 121.4 (CH arom), 121.1 (CH arom), 114.6 (CH arom), 54.6 (CH(CH<sub>3</sub>)<sub>2</sub>), 33.9 (d, J<sub>CP</sub> = 37 Hz, 2 C(CH<sub>3</sub>)<sub>3</sub>), 28.2 (6 C(CH<sub>3</sub>)<sub>3</sub>), 24.7 (d, J<sub>CP</sub> = 42 Hz, CH<sub>2</sub>P), 23.6 (2 CH(CH<sub>3</sub>)<sub>2</sub>).

$^{31}\text{P}\{^1\text{H}\}$  NMR (162 MHz,  $\text{CD}_2\text{Cl}_2$ ):  $\delta$  28.3 ppm.

HRMS (ESI):  $m/z$  calcd for  $\text{C}_{20}\text{H}_{33}\text{N}_3\text{P}$  [(*M*-HBr-Br) $^+$ ]: 346.2490; found: 346.2404.

Synthesis of the imidazolium salt **1b**

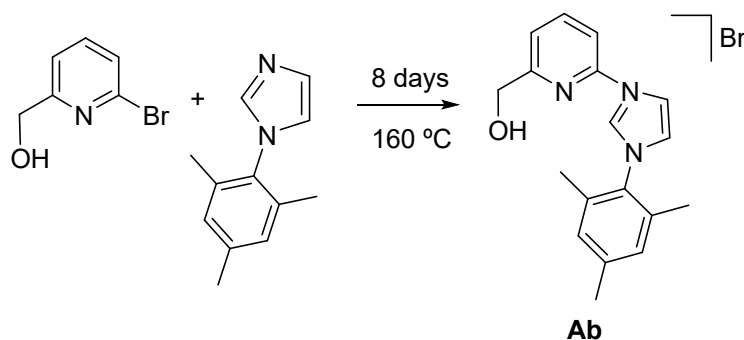

A mixture of 6-bromo-2-(hydroxymethyl)pyridine (1.49 g, 8.0 mmol) and 1-mesityl-1H-imidazole (1.50 g, 8.0 mmol) was heated to 160 °C for 8 days. The resulting solid was washed with  $\text{Et}_2\text{O}$  (3 x 20 mL), and crystallized from a  $\text{CH}_2\text{Cl}_2$ /toluene solvent mixture. White solid (1.161 g, 39%).

$^1\text{H}$  NMR (400 MHz,  $\text{CD}_3\text{OD}$ ):  $\delta$  10.22 (s, 1H, H arom Imid), 8.72 (d,  $^3J_{\text{HH}} = 2.0$  Hz, 1H, H arom Imid), 8.18 (dd,  $^3J_{\text{HH}} = 8.0$  Hz,  $^3J_{\text{HH}} = 8.0$  Hz, 1H, H arom Py), 7.98 (d,  $^3J_{\text{HH}} = 2.0$  Hz, 1H, H arom Imid), 7.97 (d,  $^3J_{\text{HH}} = 8.0$  Hz, 1H, H arom Py), 7.77 (d,  $^3J_{\text{HH}} = 8.0$  Hz, 1H, H arom Py), 7.21 (s, 2H, 2 H arom Mes), 4.83 (s, 2H,  $\text{CH}_2\text{O}$ ), 2.42 (s, 3H,  $\text{CH}_3$  Mes), 2.21 (s, 6H, 2  $\text{CH}_3$  Mes).

$^{13}\text{C}\{^1\text{H}\}$  NMR (101 MHz,  $\text{CD}_3\text{OD}$ ):  $\delta$  164.6 ( $\text{C}_q$  arom), 148.0 ( $\text{C}_q$  arom), 143.7 ( $\text{C}_q$  arom), 143.1 (CH arom), 136.6 (2  $\text{C}_q$  arom), 133.3 ( $\text{C}_q$  arom), 131.7 (2 CH arom), 127.3 (CH arom), 127.2 (CH arom), 124.0 (CH arom), 122.3 (CH arom), 114.4 (CH arom), 66.1 ( $\text{CH}_2\text{O}$ ), 22.0 ( $\text{CH}_3$  Mes), 18.3 (2  $\text{CH}_3$  Mes).

HRMS (ESI):  $m/z$  calcd for  $\text{C}_{18}\text{H}_{20}\text{N}_3\text{O}$  [(*M*-Br) $^+$ ]: 294.1606; found: 294.1604.

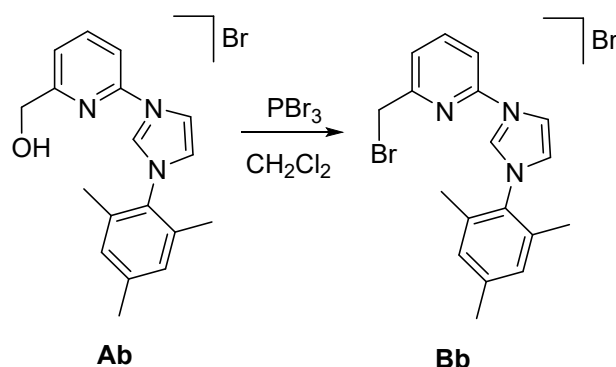

To a solution of **Ab** (1.10 g, 3.0 mmol) in  $\text{CH}_2\text{Cl}_2$  (30 mL) cooled to 0 °C was added  $\text{PBr}_3$  (0.28 mL, 3.0 mmol) dropwise. The resulting solution was stirred at room temperature for 24 h. The reaction mixture was treated with a saturated aqueous solution of  $\text{Na}_2\text{CO}_3$  until pH = 5-6. The aqueous phase was separated, and extracted with  $\text{CH}_2\text{Cl}_2$  (4 x 20 mL). Organic phases were combined, and dried over  $\text{Na}_2\text{SO}_4$ . The desired product was obtained after evaporation of the solvent as a white solid (1.02 g, 78%).

**$^1\text{H}$  NMR** (400 MHz,  $\text{CD}_3\text{OD}$ ):  $\delta$  10.20 (s, 1H, H arom Imid), 8.72 (d,  $^3J_{\text{HH}} = 1.6$  Hz, 1H, H arom Imid), 8.22 (dd,  $^3J_{\text{HH}} = 8.0$  Hz,  $^3J_{\text{HH}} = 8.0$  Hz, 1H, H arom Py), 8.01 (m, 2H, H arom Imid + H arom Py), 7.82 (d,  $^3J_{\text{HH}} = 8.0$  Hz, 1H, H arom Py), 7.21 (s, 2H, 2 H arom Mes), 4.74 (s, 2H,  $\text{CH}_2\text{Br}$ ), 2.42 (s, 3H,  $\text{CH}_3$  Mes), 2.21 (s, 6H, 2  $\text{CH}_3$  Mes).

**$^{13}\text{C}\{^1\text{H}\}$  NMR** (101 MHz,  $\text{CD}_3\text{OD}$ ):  $\delta$  160.1 ( $\text{C}_q$  arom), 148.4 ( $\text{C}_q$  arom), 143.7 (2 CH arom), 138.3 ( $\text{C}_q$  arom), 136.6 (2  $\text{C}_q$  arom), 133.3 ( $\text{C}_q$  arom), 131.7 (2 CH arom), 127.4 (CH arom), 127.2 (CH arom), 122.4 (CH arom), 115.7 (CH arom), 33.6 ( $\text{CH}_2\text{Br}$ ), 22.0 ( $\text{CH}_3$  Mes), 18.3 (2  $\text{CH}_3$  Mes).

**HRMS** (ESI):  $m/z$  calcd for  $\text{C}_{18}\text{H}_{20}\text{BrN}_3$  [ $(M-\text{Br})^+$ ]: 356.0762; found: 356.0760.

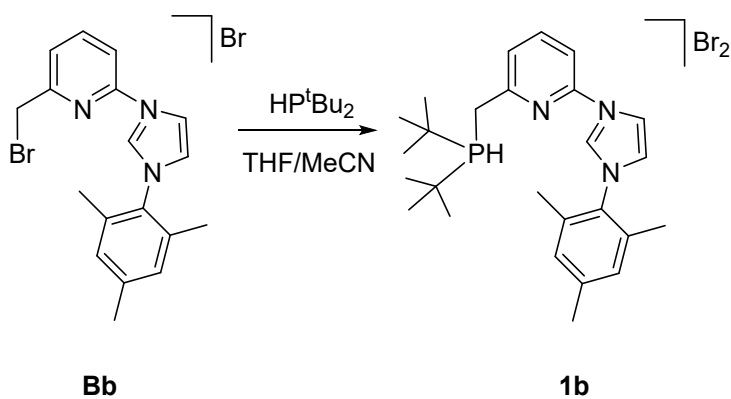

To a solution of **Bb** (0.673 g, 1.5 mmol) in THF (3 mL) / MeCN (9 mL) was added  $\text{HP}^t\text{Bu}_2$  (0.42 mL, 2.3 mmol) dropwise. The resulting solution was stirred at room temperature for

3 days. Volatiles were removed under vacuum, and the resulting solid was washed with cold THF (2 x 5 mL) to give a yellow solid (0.470 g, 53%).

**<sup>1</sup>H NMR** (400 MHz, CD<sub>2</sub>Cl<sub>2</sub>): δ 11.53 (s, 1H, H arom Imid), 9.34 (dt, <sup>1</sup>J<sub>HP</sub> = 500 Hz, <sup>3</sup>J<sub>HH</sub> = 4.8 Hz, 1H, <sup>t</sup>Bu<sub>2</sub>PH), 9.55 (s, 1H, H arom Imid), 8.67 (d, <sup>3</sup>J<sub>HH</sub> = 8.0 Hz, 1H, H arom Py), 8.25 (d, <sup>3</sup>J<sub>HH</sub> = 8.0 Hz, 1H, H arom Py), 8.00 (dd, <sup>3</sup>J<sub>HH</sub> = 8.0 Hz, <sup>3</sup>J<sub>HH</sub> = 8.0 Hz, 1H, H arom Py), 7.53 (s, 1H, H arom Imid), 7.06 (s, 2H, 2 H arom Mes), 4.50 (dd, <sup>2</sup>J<sub>HP</sub> = 13.0 Hz, <sup>3</sup>J<sub>HH</sub> = 4.8 Hz, 2H, CH<sub>2</sub>P), 2.34 (s, 3H, CH<sub>3</sub> Mes), 2.18 (s, 6H, 2 CH<sub>3</sub> Mes), 1.55 (d, <sup>3</sup>J<sub>HP</sub> = 16.0 Hz, 18H, 2 C(CH<sub>3</sub>)<sub>3</sub>).

**<sup>13</sup>C{<sup>1</sup>H} NMR** (101 MHz, CD<sub>2</sub>Cl<sub>2</sub>): δ 152.9 (C<sub>q</sub> arom), 146.3 (C<sub>q</sub> arom), 142.1 (CH arom), 141.4 (C<sub>q</sub> arom), 137.1 (C<sub>q</sub> arom), 134.3 (2 C<sub>q</sub> arom), 129.8 (CH arom), 129.7 (2 CH arom), 126.7 (CH arom), 124.4 (CH arom), 121.7 (CH arom), 115.1 (CH arom), 33.2 (d, J<sub>CP</sub> = 34 Hz, 2 C(CH<sub>3</sub>)<sub>3</sub>), 27.4 (2 C(CH<sub>3</sub>)<sub>3</sub>), 23.9 (d, J<sub>CP</sub> = 41 Hz, CH<sub>2</sub>P), 20.9 (CH<sub>3</sub> Mes), 17.7 (2 CH<sub>3</sub> Mes).

**<sup>31</sup>P{<sup>1</sup>H} NMR** (162 MHz, CD<sub>2</sub>Cl<sub>2</sub>): δ 29.8 ppm.

**HRMS** (ESI): *m/z* calcd for C<sub>26</sub>H<sub>37</sub>N<sub>3</sub>P [(M-HBr-Br)<sup>+</sup>]: 422.2725; found: 422.2722.

### 1.3. Synthesis and characterisation of nickel complexes 2

#### Complex 2a

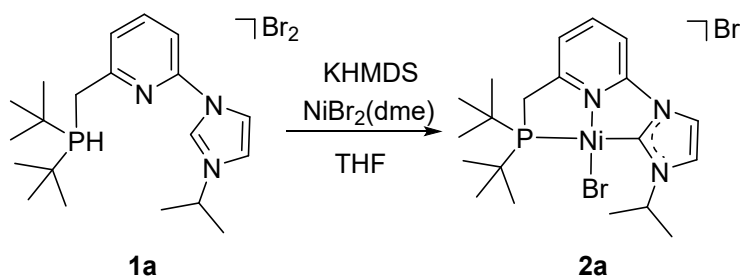

KHMDS (0.079 g, 0.39 mmol) was added to a solution of **1a** (0.100 g, 0.20 mmol) in THF (10 mL), and the resulting mixture was stirred for 30 min. Then, NiBr<sub>2</sub>(dme) (0.061 g, 0.20 mmol) was added, and the suspension was stirred overnight. Volatiles were removed under vacuum, and the residue was extracted with CH<sub>2</sub>Cl<sub>2</sub> (2 x 10 mL). Solvent was evaporated, and the solid was washed with Et<sub>2</sub>O (2 x 10 mL). Red solid (0.092 g, 83%).



**<sup>1</sup>H NMR** (400 MHz, CD<sub>2</sub>Cl<sub>2</sub>): δ 8.76 (d, <sup>3</sup>J<sub>HH</sub> = 1.3 Hz, 1H, H arom NHC), 8.50 (d, <sup>3</sup>J<sub>HH</sub> = 8.1 Hz, 1H, H arom Py), 8.20 (dd, <sup>3</sup>J<sub>HH</sub> = 8.1 Hz, <sup>3</sup>J<sub>HH</sub> = 8.1 Hz, 1H, H arom Py), 7.57 (d, <sup>3</sup>J<sub>HH</sub> = 8.1 Hz, 1H, H arom Py), 7.23 (d, <sup>3</sup>J<sub>HH</sub> = 1.3 Hz, 1H, H arom NHC), 5.97 (m, 1H, CH(CH<sub>3</sub>)<sub>2</sub>), 3.56 (d, <sup>2</sup>J<sub>HP</sub> = 9.8 Hz, 2H, CH<sub>2</sub>P), 1.58 (d, <sup>3</sup>J<sub>HP</sub> = 14.2 Hz, 18H, 2 C(CH<sub>3</sub>)<sub>3</sub>), 1.46 (d, <sup>3</sup>J<sub>HH</sub> = 6.7 Hz, 6 H, CH(CH<sub>3</sub>)<sub>2</sub>).

**<sup>13</sup>C{<sup>1</sup>H} NMR** (101 MHz, CD<sub>2</sub>Cl<sub>2</sub>): δ 164.4 (d, J<sub>CP</sub> = 8 Hz, C<sub>q</sub> arom), 161.7 (d, J<sub>CP</sub> = 102 Hz, C-2 NHC), 152.5 (C<sub>q</sub> arom), 144.6 (CH arom), 122.1 (d, J<sub>CP</sub> = 9 Hz, CH arom), 121.4 (CH arom), 119.0 (CH arom), 112.3 (CH arom), 51.4 (CH(CH<sub>3</sub>)<sub>2</sub>), 37.1 (d, J<sub>CP</sub> = 15 Hz, 2 C(CH<sub>3</sub>)<sub>3</sub>), 34.9 (d, J<sub>CP</sub> = 20 Hz, CH<sub>2</sub>P), 29.8 (6 C(CH<sub>3</sub>)<sub>3</sub>), 23.7 (2 CH(CH<sub>3</sub>)<sub>2</sub>).

**<sup>31</sup>P{<sup>1</sup>H} NMR** (162 MHz, THF-*d*<sub>3</sub>): δ 57.0 ppm.

**Anal. Calcd** (%) for C<sub>20</sub>H<sub>32</sub>Br<sub>2</sub>N<sub>3</sub>NiP: C 42.59, H 5.72, N 7.45; found C 42.18, H 5.79, N 7.77.

### Complex 2b

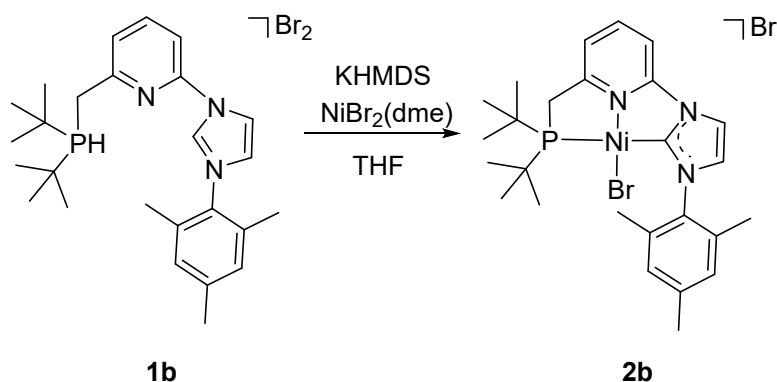

KHMDS (0.144 g, 0.72 mmol) was added to a solution of **1b** (0.200 g, 0.34 mmol) in THF (15 mL), and the resulting mixture was stirred for 30 min. Then, NiBr<sub>2</sub>(dme) (0.106 g, 0.34 mmol) was added, and the suspension was stirred overnight. Volatiles were removed under vacuum, and the residue was extracted with CH<sub>2</sub>Cl<sub>2</sub> (2 × 10 mL). Solvent was evaporated and the solid was washed with Et<sub>2</sub>O (2 × 10 mL). Orange solid (0.191 g, 87%).

**<sup>1</sup>H NMR** (400 MHz, CD<sub>2</sub>Cl<sub>2</sub>): δ 9.27 (s, 1H, H arom NHC), 8.90 (d, <sup>3</sup>J<sub>HH</sub> = 8.2 Hz, 1H, H arom Py), 8.29 (dd, <sup>3</sup>J<sub>HH</sub> = 8.2 Hz, <sup>3</sup>J<sub>HH</sub> = 8.2 Hz, 1H, H arom Py), 7.66 (d, <sup>3</sup>J<sub>HH</sub> = 8.2 Hz, 1H, H arom Py), 7.00 (s, 2H, H arom Mes), 6.99 (s, 1H, H arom NHC), 3.65 (d, <sup>2</sup>J<sub>HP</sub> = 9.6 Hz, 2H, CH<sub>2</sub>P), 2.37 (s, 3H, CH<sub>3</sub> Mes), 2.16 (s, 6H, 2 CH<sub>3</sub> Mes), 1.53 (d, <sup>3</sup>J<sub>HP</sub> = 14.5 Hz, 18H, 2 C(CH<sub>3</sub>)<sub>3</sub>).

$^{13}\text{C}\{^1\text{H}\}$  NMR (101 MHz,  $\text{CD}_2\text{Cl}_2$ ):  $\delta$  164.5 (d,  $J_{\text{CP}} = 8$  Hz,  $\text{C}_q$  arom), 164.4 (d,  $J_{\text{CP}} = 109$  Hz, C-2 NHC), 152.6 ( $\text{C}_q$  arom), 144.6 (CH arom), 140.4 ( $\text{C}_q$  arom), 135.5 ( $\text{C}_q$  arom), 135.1 (2  $\text{C}_q$  arom), 129.6 (2 CH arom), 127.0 (d,  $J_{\text{CP}} = 4$  Hz, CH arom), 122.4 (d,  $J_{\text{CP}} = 8$  Hz, CH arom), 119.7 (CH arom), 112.9 (CH arom), 36.8 (d,  $J_{\text{CP}} = 15$  Hz, 2  $\text{C}(\text{CH}_3)_3$ ), 34.7 (d,  $J_{\text{CP}} = 20$  Hz,  $\text{CH}_2\text{P}$ ), 29.7 (2  $\text{C}(\text{CH}_3)_3$ ), 21.6 ( $\text{CH}_3$  Mes), 18.5 (2  $\text{CH}_3$  Mes).

$^{31}\text{P}\{^1\text{H}\}$  NMR (162 MHz,  $\text{CD}_3\text{CN}$ ):  $\delta$  57.8 ppm.

**Anal. Calcd** (%) for  $\text{C}_{26}\text{H}_{36}\text{Br}_2\text{N}_3\text{NiP}$ : C 48.79, H 5.67, N 6.57; found C 48.81, H 6.02, N 6.57.

#### 1.4. Synthesis and characterisation of nickel complexes 3

##### Complex 3a

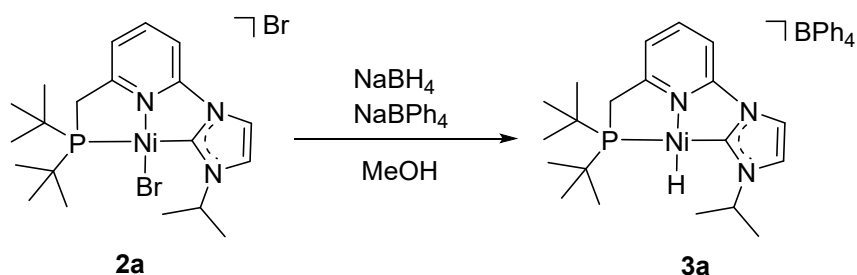

Complex **2a** (0.050 g, 0.09 mmol) was dissolved in  $\text{MeOH}$  (7 mL), and  $\text{NaBH}_4$  (0.017 g, 0.44 mmol) was added in two portions. When bubbling ended, a solution of  $\text{NaBPh}_4$  (0.036 g, 0.11 mmol) in  $\text{MeOH}$  (1 mL) was added. The reaction mixture was left at room temperature for 2 h, and then cooled to  $-30$  °C for 3 days. After this time, red crystals were separated by filtration, and washed with  $\text{Et}_2\text{O}$  ( $4 \times 3$  mL). Red crystals (0.038 g, 68%).

$^1\text{H}$  NMR (400 MHz,  $\text{THF}-d_8$ ):  $\delta$  7.65 (dd,  $^3J_{\text{HH}} = 8.0$  Hz,  $^3J_{\text{HH}} = 8.0$  Hz, 1H, H arom Py), 7.39 (s, 1H, H arom NHC), 7.36 (m, 8H, H arom  $\text{BPh}_4$ ), 7.27 (s, 1H, H arom NHC), 7.16 (d,  $^3J_{\text{HH}} = 8.0$  Hz, 1H, H arom Py), 7.04 (d,  $^3J_{\text{HH}} = 8.0$  Hz, 1H, H arom Py), 6.89 (dd, 8H,  $^3J_{\text{HH}} = 7.0$  Hz, H arom  $\text{BPh}_4$ ), 6.74 (t, 4H,  $^3J_{\text{HH}} = 7.0$  Hz, H arom  $\text{BPh}_4$ ), 4.91 (hept,  $^3J_{\text{HH}} = 6.7$  Hz, 1H,  $\text{CH}(\text{CH}_3)_2$ ), 3.57 (d,  $^2J_{\text{HP}} = 8.6$  Hz, 2H,  $\text{CH}_2\text{P}$ ), 1.50 (d,  $^3J_{\text{HH}} = 6.7$  Hz, 6H,  $\text{CH}(\text{CH}_3)_2$ ), 1.38 (d,  $^3J_{\text{HP}} = 14.4$  Hz, 18H, 2  $\text{C}(\text{CH}_3)_3$ ), -18.00 (d,  $^2J_{\text{HP}} = 71.8$  Hz, 1H, NiH).

$^{13}\text{C}\{^1\text{H}\}$  NMR (101 MHz, THF- $d_8$ ):  $\delta$  178.8 (d,  $J_{\text{CP}} = 81$  Hz, C-2 NHC), 166.6 ( $\text{C}_q$  arom), 166.1 ( $\text{C}_q$  arom), 165.6 ( $\text{C}_q$  arom), 165.1 ( $\text{C}_q$  arom), 163.7 (d,  $J_{\text{CP}} = 8$  Hz,  $\text{C}_q$  arom), 152.3 (d,  $J_{\text{CP}} = 4$  Hz,  $\text{C}_q$  arom), 143.9 (CH arom), 137.8 (8 CH arom  $\text{BPh}_4$ ), 126.5 (8 CH arom  $\text{BPh}_4$ ), 122.9 (d,  $J_{\text{CP}} = 8$  Hz, CH arom), 122.6 (4 CH arom  $\text{BPh}_4$ ), 120.8 (CH arom), 118.3 (CH arom) 109.7 (CH arom), 56.2 ( $\text{CH}(\text{CH}_3)_2$ ), 35.5 (d,  $J_{\text{CP}} = 18$  Hz,  $\text{CH}_2\text{P}$ ), 35.3 (d,  $J_{\text{CP}} = 19$  Hz, 2  $\text{C}(\text{CH}_3)_3$ ), 29.9 (d,  $J_{\text{CP}} = 5$  Hz, 2  $\text{C}(\text{CH}_3)_3$ ), 23.8 (2  $\text{CH}(\text{CH}_3)_2$ ).

$^{31}\text{P}\{^1\text{H}\}$  NMR (162 MHz, THF- $d_8$ ):  $\delta$  85.8 ppm.

IR (ATR): 1901  $\text{cm}^{-1}$  (m,  $\nu_{\text{NiH}}$ ).

**Anal. Calcd** (%) for  $\text{C}_{44}\text{H}_{53}\text{BN}_3\text{NiP}$ : C 72.95, H 7.37, N 5.80; found C 72.75, H 7.72, N 6.14.

### Complex 3b

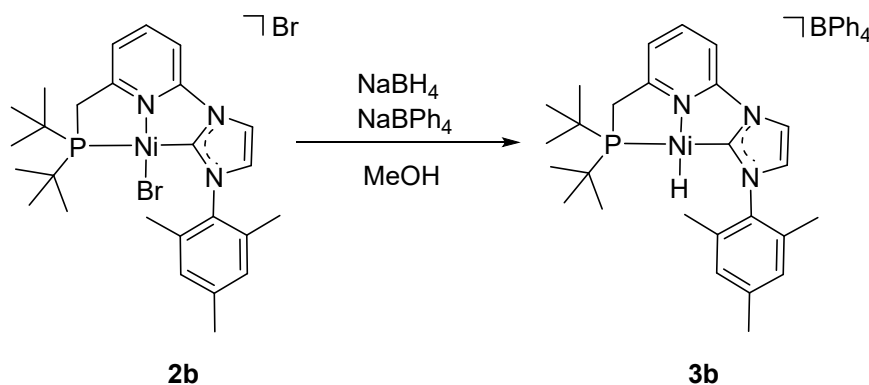

Complex **2b** (0.050 g, 0.08 mmol) was dissolved in MeOH (7 mL), and  $\text{NaBH}_4$  (0.015 mg, 0.39 mmol) was added in two portions. When bubbling ended, a solution of  $\text{NaBPh}_4$  (0.032 g, 0.09 mmol) in MeOH (1 mL) was added. The reaction mixture was left at room temperature for 2 h, and then cooled to  $-30$   $^\circ\text{C}$  for 3 days. After this time, the precipitate was separated by filtration, and washed with  $\text{Et}_2\text{O}$  ( $4 \times 3$  mL). Yellow solid (0.046 g, 74%).

$^1\text{H}$  NMR (400 MHz, THF- $d_8$ ):  $\delta$  7.67 (dd,  $^3J_{\text{HH}} = 7.6$  Hz,  $^3J_{\text{HH}} = 7.6$  Hz, 1H, H arom Py), 7.57 (s, 1H, H arom NHC), 7.36 (br s, 8H, H arom  $\text{BPh}_4$ ), 7.19 (s, 1H, H arom NHC), 7.18 (br s, 1H, H arom Py), 7.07 (br s, 3H, H arom Py + 2 H arom Mes), 6.88 (dd,  $^3J_{\text{HH}} = 7.6$  Hz, 8H, H arom  $\text{BPh}_4$ ), 6.73 (t,  $^3J_{\text{HH}} = 7.0$  Hz, 4H, H arom  $\text{BPh}_4$ ), 3.56 (d,  $^2J_{\text{HP}} = 8.7$  Hz, 2 H,  $\text{CH}_2\text{P}$ ), 2.38 (s, 3H,  $\text{CH}_3$  Mes), 2.14 (s, 6H, 2  $\text{CH}_3$  Mes), 1.30 (d,  $^3J_{\text{HP}} = 14.4$  Hz, 18H, 2  $\text{C}(\text{CH}_3)_3$ ), -18.35 (d,  $^2J_{\text{HP}} = 68.3$  Hz, 1H, NiH).

**$^{13}\text{C}\{^1\text{H}\}$  NMR** (101 MHz, THF- $d_8$ ):  $\delta$  181.8 (d,  $J_{\text{CP}} = 83$  Hz, C-2 NHC), 166.6 ( $\text{C}_q$  arom), 166.1 ( $\text{C}_q$  arom), 165.6 ( $\text{C}_q$  arom), 165.1 ( $\text{C}_q$  arom), 163.7 (d,  $J_{\text{CP}} = 8$  Hz,  $\text{C}_q$  arom), 152.3 (d,  $J_{\text{CP}} = 4$  Hz,  $\text{C}_q$  arom), 143.9 (CH arom), 140.6 ( $\text{C}_q$  arom), 137.8 (8 CH arom BPh $_4$ ), 137.6 ( $\text{C}_q$  arom), 135.6 (2  $\text{C}_q$  arom), 130.5 (2 CH arom), 126.5 (8 CH arom BPh $_4$ ), 126.3 (CH arom), 123.2 (d,  $J_{\text{CP}} = 10$  Hz, CH arom), 122.6 (4 CH arom BPh $_4$ ), 118.4 (CH arom), 110.2 (CH arom), 35.6 (d,  $J_{\text{CP}} = 21$  Hz,  $\text{CH}_2\text{P}$ ), 35.2 (d,  $J_{\text{CP}} = 18$  Hz, 2  $\text{C}(\text{CH}_3)_3$ ), 29.9 (d,  $J_{\text{CP}} = 5$  Hz, 2  $\text{C}(\text{CH}_3)_3$ ), 21.8 ( $\text{CH}_3$  Mes), 18.8 (2  $\text{CH}_3$  Mes).

**$^{31}\text{P}\{^1\text{H}\}$  NMR** (162 MHz,  $\text{CD}_3\text{CN}$ ):  $\delta$  85.2 ppm.

**IR** (ATR): 1888  $\text{cm}^{-1}$  (m,  $\nu_{\text{NiH}}$ ).

**Anal. Calcd** (%) for  $\text{C}_{50}\text{H}_{57}\text{BN}_3\text{NiP}$ : C 75.02, H 7.18, N 5.25; found C 75.38, H 7.23, N 5.55.

## 1.5. Synthesis and characterisation of nickel complexes 4

### Complex 4a

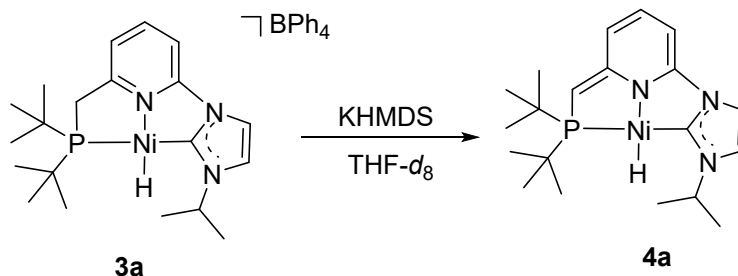

In a J. Young-valved NMR tube, a solution of complex **3a** (0.015 g, 0.02 mmol) in THF- $d_8$  (0.45 mL) was treated with KHMDS (0.005 g, 0.03 mmol). The sample was analysed by NMR spectroscopy after 30 min, observing the formation of complex **4a**. The attempted isolation of the product was unsuccessful, and therefore was characterised spectroscopically.

**$^1\text{H}$  NMR** (400 MHz, THF- $d_8$ ):  $\delta$  7.41 (s, 1H, H arom NHC), 7.20 (s, 1H, H arom NHC), 6.41 (dd,  $^3J_{\text{HH}} = 9.2$  Hz,  $^3J_{\text{HH}} = 6.5$  Hz, 1H, H arom Py), 5.95 (d,  $^3J_{\text{HH}} = 9.2$  Hz, 1H, H arom Py), 5.34 (d,  $^3J_{\text{HH}} = 6.5$  Hz, 1H, H arom Py), 5.00 (hept, 1H,  $^3J_{\text{HH}} = 6.9$  Hz,  $\text{CH}(\text{CH}_3)_2$ ), 3.26 (s, 1H, CHP), 1.47 (d, 6H,  $^3J_{\text{HH}} = 6.9$  Hz,  $\text{CH}(\text{CH}_3)_2$ ), 1.34 (d,  $^3J_{\text{HP}} = 13.1$  Hz, 18H, 2  $\text{C}(\text{CH}_3)_3$ ), -17.49 (d, 1H,  $^2J_{\text{HP}} = 67.2$  Hz, NiH).

$^{13}\text{C}\{^1\text{H}\}$  NMR (101 MHz, THF- $d_8$ ):  $\delta$  182.5 (d,  $J_{\text{CP}} = 73$  Hz, C-2 NHC), 169.5 (d,  $J_{\text{CP}} = 19$  Hz,  $\text{C}_q$  arom), 152.1 ( $\text{C}_q$  arom), 134.2 (CH arom), 117.9 (CH arom), 116.1 (CH arom), 113.6 (d,  $J_{\text{CP}} = 14$  Hz, CH arom), 84.1 (CH arom), 65.1 (d,  $J_{\text{CP}} = 50$  Hz, CHP), 54.9 ( $\text{CH}(\text{CH}_3)_2$ ), 35.5 (d,  $J_{\text{CP}} = 24$  Hz, 2  $\text{C}(\text{CH}_3)_3$ ), 30.5 (d,  $J_{\text{CP}} = 5$  Hz, 2  $\text{C}(\text{CH}_3)_3$ ), 23.9 (2  $\text{CH}(\text{CH}_3)_2$ ).

$^{31}\text{P}\{^1\text{H}\}$  NMR (162 MHz, THF- $d_8$ ):  $\delta$  76.6 ppm.

IR (ATR): 1841  $\text{cm}^{-1}$  (m,  $\nu_{\text{NiH}}$ ).

### Complex 4b

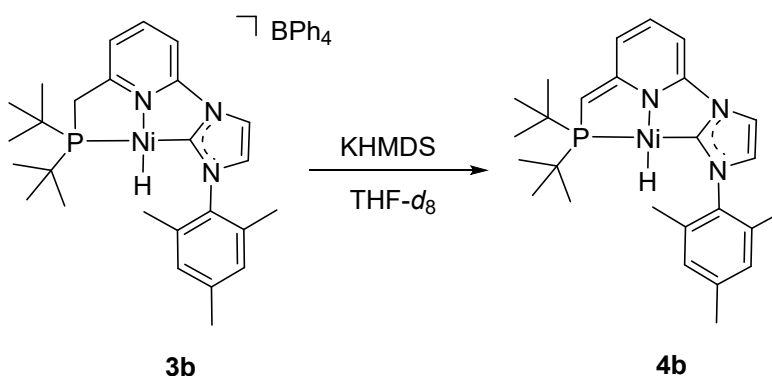

In a J. Young-valved NMR tube, a solution of complex **3b** (0.015 g, 0.02 mmol) in THF- $d_8$  (0.45 mL) was treated with KHMDS (0.005 g, 0.02 mmol). The sample was analysed by NMR spectroscopy after 30 min, observing the formation of complex **4b**. The attempted isolation of the product was unsuccessful, and therefore was characterised spectroscopically.

$^1\text{H}$  NMR (400 MHz, THF- $d_8$ ):  $\delta$  7.60 (s, 1H, H arom NHC), 7.07 (s, 1H, H arom NHC), 6.99 (s, 2 H, H arom Mes), 6.46 (dd,  $^3J_{\text{HH}} = 8.8$  Hz,  $^3J_{\text{HH}} = 6.6$  Hz, 1H, H arom Py), 5.99 (d,  $^3J_{\text{HH}} = 8.8$  Hz, 1H, H arom Py), 5.43 (d,  $^3J_{\text{HH}} = 6.6$  Hz, 1H, H arom Py), 3.27 (s, 1H, CHP), 2.35 (s, 3H,  $\text{CH}_3$  Mes), 2.16 (s, 6H, 2  $\text{CH}_3$  Mes), 1.27 (d,  $^3J_{\text{HP}} = 13.4$  Hz, 18H, 2  $\text{C}(\text{CH}_3)_3$ ), -17.90 (d,  $^2J_{\text{HP}} = 66.5$  Hz, 1H, NiH).

$^{13}\text{C}\{^1\text{H}\}$  NMR (101 MHz, THF- $d_8$ ):  $\delta$  185.0 (d,  $J_{\text{CP}} = 75$  Hz, C-2 NHC), 169.5 (d,  $J_{\text{CP}} = 20$  Hz,  $\text{C}_q$  arom), 152.5 ( $\text{C}_q$  arom), 139.7 ( $\text{C}_q$  arom), 138.8 ( $\text{C}_q$  arom), 136.3 (2  $\text{C}_q$  arom), 134.3 (CH arom), 130.4 (2 CH arom), 124.0 (CH arom), 116.5 (CH arom), 114.2 (d,  $J_{\text{CP}} = 16$  Hz, CH arom), 84.7 (CH arom), 65.6 (d,  $J_{\text{CP}} = 49$  Hz, CHP), 35.7 (d,  $J_{\text{CP}} = 23$  Hz, 2  $\text{C}(\text{CH}_3)_3$ ), 30.7 (d,  $J_{\text{CP}} = 5$  Hz, 2  $\text{C}(\text{CH}_3)_3$ ), 22.0 ( $\text{CH}_3$  Mes), 19.3 (2  $\text{CH}_3$  Mes).

$^{31}\text{P}\{^1\text{H}\}$  NMR (162 MHz, THF- $d_8$ ):  $\delta$  76.3 ppm.

IR (ATR): 1857  $\text{cm}^{-1}$  (br,  $\nu_{\text{NiH}}$ ).

## 1.6. Synthesis and characterisation of nickel complexes 5

### Complex 5a

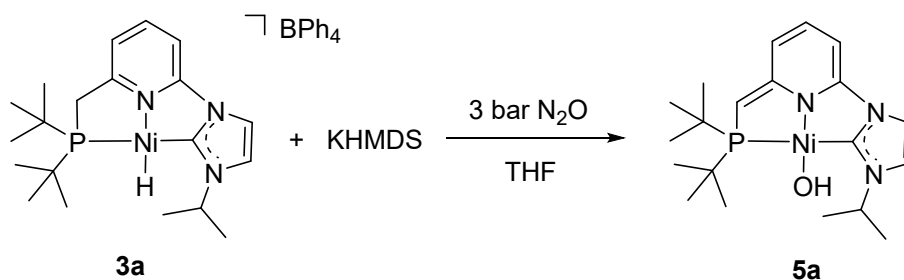

In a Fisher–Porter vessel, a solution of complex **3a** (0.030 g, 0.04 mmol) in THF (5 mL) was treated with KHMDS (0.009 g, 0.05 mmol), and the mixture was stirred at room temperature for 12 h. After this time, the mixture was pressurized with 3 bar of  $\text{N}_2\text{O}$ , and stirred at 55 °C for 48 h. The system was depressurised, solvent was evaporated and the residue was extracted with  $\text{Et}_2\text{O}$  (2 x 7 mL). The desired product was obtained after evaporation of the solvent as a dark red solid (0.016 g, 90%). Satisfactory elemental analysis for this derivative could not be obtained due to partial decomposition during work-up.

$^1\text{H}$  NMR (400 MHz, THF- $d_8$ ):  $\delta$  7.37 (s, 1H, H arom NHC), 7.21 (s, 1H, H arom NHC), 6.37 (dd,  $^3J_{\text{HH}} = 8.7$  Hz,  $^3J_{\text{HH}} = 7.1$  Hz, 1H, H arom Py), 5.88 (hept, 1H,  $^3J_{\text{HH}} = 6.8$  Hz,  $\text{CH}(\text{CH}_3)_2$ ), 5.76 (d,  $^3J_{\text{HH}} = 8.7$  Hz, 1H, H arom Py), 5.32 (d,  $^3J_{\text{HH}} = 7.1$  Hz, 1H, H arom Py), 3.17 (s, 1H, CHP), 1.49 (d,  $^3J_{\text{HP}} = 13.4$  Hz, 18H, 2  $\text{C}(\text{CH}_3)_3$ ), 1.40 (d,  $^3J_{\text{HH}} = 6.8$  Hz, 6H,  $\text{CH}(\text{CH}_3)_2$ ), -3.85 (d,  $^3J_{\text{HP}} = 7.4$  Hz, 1H, OH).

$^{13}\text{C}\{^1\text{H}\}$  NMR (101 MHz, THF- $d_8$ ):  $\delta$  170.9 (d,  $J_{\text{CP}} = 20$  Hz,  $\text{C}_q$  arom), 168.8 (d,  $J_{\text{CP}} = 101$  Hz, C-2 NHC), 152.1 ( $\text{C}_q$  arom), 133.6 (CH arom), 119.1 (d,  $J_{\text{CP}} = 4$  Hz, CH arom), 115.1 (CH arom), 112.9 (d,  $J_{\text{CP}} = 16$  Hz, CH arom), 86.1 (CH arom), 63.1 (d,  $J_{\text{CP}} = 54$  Hz, CHP), 49.1 ( $\text{CH}(\text{CH}_3)_2$ ), 36.7 (d,  $J_{\text{CP}} = 19$  Hz, 2  $\text{C}(\text{CH}_3)_3$ ), 30.3 (d,  $J_{\text{CP}} = 4$  Hz, 2  $\text{C}(\text{CH}_3)_3$ ), 24.3 (2  $\text{CH}(\text{CH}_3)_2$ ).

$^{31}\text{P}\{^1\text{H}\}$  NMR (162 MHz, THF- $d_8$ ):  $\delta$  43.2 ppm.

IR (ATR): 3649  $\text{cm}^{-1}$  (br,  $\nu_{\text{OH}}$ ).

### Complex 5b

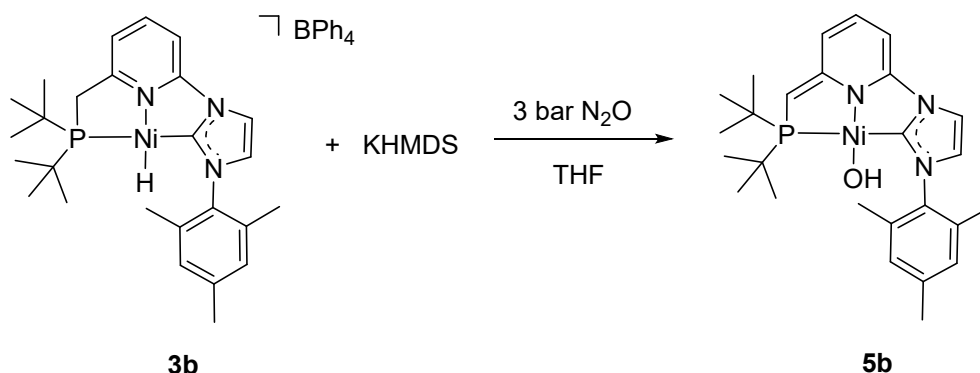

In a Fisher–Porter vessel, a solution of complex **3b** (0.030 g, 0.04 mmol) in THF (5 mL) was treated with KHMDS (0.008 g, 0.04 mmol), and the mixture was stirred at room temperature for 12 h. After this time, the solution was pressurized with 3 bar of N<sub>2</sub>O and stirred at 55 °C for 48 h. The system was depressurised, solvent was evaporated and the residue was extracted with Et<sub>2</sub>O (2 x 7 mL). The desired product was obtained after evaporation of the solvent as a dark red solid (0.017 g, 90%). Satisfactory elemental analysis for this derivative could not be obtained due to partial decomposition during work-up. Crystals suitable for X-ray diffraction analysis were obtained by slow evaporation of Et<sub>2</sub>O solutions of the complex.

**<sup>1</sup>H NMR** (400 MHz, THF-*d*<sub>8</sub>): δ 7.65 (s, 1H, H arom NHC), 7.04 (s, 1H, H arom NHC), 7.02 (s, 2 H, H arom Mes), 6.38 (dd, <sup>3</sup>J<sub>HH</sub> = 9.0 Hz, <sup>3</sup>J<sub>HH</sub> = 7.0 Hz, 1H, H arom Py), 5.80 (d, <sup>3</sup>J<sub>HH</sub> = 9.0 Hz, 1H, H arom Py), 5.41 (d, <sup>3</sup>J<sub>HH</sub> = 7.0 Hz, 1H, H arom Py), 3.22 (s, 1H, CHP), 2.33 (s, 3H, CH<sub>3</sub> Mes), 2.28 (s, 6H, 2 CH<sub>3</sub> Mes), 1.43 (d, <sup>3</sup>J<sub>HP</sub> = 12.7 Hz, 18H, 2 C(CH<sub>3</sub>)<sub>3</sub>), -3.73 (d, <sup>3</sup>J<sub>HP</sub> = 3.2 Hz, 1H, OH).

**<sup>13</sup>C{<sup>1</sup>H} NMR** (101 MHz, THF-*d*<sub>8</sub>): δ 171.7 (d, J<sub>CP</sub> = 102 Hz, C-2 NHC), 170.9 (d, J<sub>CP</sub> = 20 Hz, C<sub>q</sub> arom), 151.4 (d, J<sub>CP</sub> = 6 Hz, C<sub>q</sub> arom), 140.9 (C<sub>q</sub> arom), 136.8 (2 C<sub>q</sub> arom), 135.7 (C<sub>q</sub> arom), 133.1 (CH arom), 130.9 (2 CH arom), 124.6 (d, J<sub>CP</sub> = 4 Hz, CH arom), 116.0 (CH arom), 113.6 (d, J<sub>CP</sub> = 16 Hz, CH arom), 86.1 (CH arom), 64.3 (d, J<sub>CP</sub> = 50 Hz, CHP), 36.7 (d, J<sub>CP</sub> = 18 Hz, 2 C(CH<sub>3</sub>)<sub>3</sub>), 30.0 (d, J<sub>CP</sub> = 4 Hz, 2 C(CH<sub>3</sub>)<sub>3</sub>), 22.0 (CH<sub>3</sub> Mes), 18.8 (2 CH<sub>3</sub> Mes).

**<sup>31</sup>P{<sup>1</sup>H} NMR** (162 MHz, THF-*d*<sub>8</sub>): δ 44.3 ppm.

**IR** (ATR): 3599 cm<sup>-1</sup> (br, ν<sub>OH</sub>).

## 1.7. Representative procedure of N<sub>2</sub>O reduction with pinacolborane

In a glovebox, a J.Young valved NMR tube was charged with 37  $\mu$ L of a freshly prepared 0.025 M stock solution of **3b** (0.9  $\mu$ mol) in THF-*d*<sub>8</sub>, 11  $\mu$ L of a 0.1 M stock solution of KHMDS (1.1  $\mu$ mol) in THF-*d*<sub>8</sub>, and 0.4 mL of THF-*d*<sub>8</sub>. Then, pinacolborane (27  $\mu$ L, 0.19 mmol) and mesitylene (5  $\mu$ L) were added, and the nitrogen atmosphere in the tube was replaced by 2 bar of N<sub>2</sub>O by performing three freeze-pump-thaw cycles. The reaction progress, pinBOH:(pinB)<sub>2</sub>O ratio, and H<sub>2</sub> formation (not quantified) were determined by <sup>1</sup>H and/or <sup>11</sup>B{<sup>1</sup>H} NMR spectroscopies. H<sub>2</sub> evolution is expected to arise from the formation of (pinB)<sub>2</sub>O by reaction of pinacolborane and pinBOH.<sup>[2,3]</sup> In a control experiment using catalytic amounts of KHMDS in the absence of the Ni precursors, conversion of HBpin to the corresponding oxidation products was not observed.

Hg test: In a glovebox, a J.Young valved NMR tube was charged with 37  $\mu$ L of a freshly prepared 0.025 M stock solution of **3b** (0.9  $\mu$ mol) in THF-*d*<sub>8</sub>, 11  $\mu$ L of a 0.1 M stock solution of KHMDS (1.1  $\mu$ mol) in THF-*d*<sub>8</sub>, and 0.4 mL of THF-*d*<sub>8</sub>. Then, pinacolborane (27  $\mu$ L, 0.19 mmol), Hg (0.010 g, 0.05 mmol; 53 equiv) and mesitylene (5  $\mu$ L) were added, and the nitrogen atmosphere in the tube was replaced by 2 bar of N<sub>2</sub>O by performing three freeze-pump-thaw cycles. The reaction progress was monitored by <sup>1</sup>H and <sup>11</sup>B{<sup>1</sup>H} NMR spectroscopies, and found to proceed as the experiment in entry 4, Table 1 (2.5 h: >99% conv; pinBOH:(pinB)<sub>2</sub>O ratio = 2:8).

To qualitatively determine the formation of N<sub>2</sub>, a GC-MS analysis of the gas atmosphere was carried out using a Shimadzu GCMS-TQ8040 apparatus equipped with a PoraBOND Q capillary column (25 m, 0.25 mm i.d., 3  $\mu$ m film thickness). Helium carrier gas was supplied at a head pressure of 3.7 psi to provide an initial flow rate of 4.6 mL/min. The injector temperature was set up to 200 °C, and the oven temperature was initially held at 30 °C for 5 min, then gradually increased to 150 °C at 25 °C/min. Full-scan mass spectra were collected from *m/z* 10 to 50 at a data acquisition rate of 158 spectra/s. The MS transfer line was held at 250 °C, and the ion source temperature was 200 °C.

---

<sup>2</sup> Y. Pang, M. Leutzsch, N. Nöthling and J. Cornella, *J. Am. Chem. Soc.*, 2020, **142**, 19473.

<sup>3</sup> X. Chen, H. Wang, S. Du, M. Driess and Z. Mo, *Angew. Chem. Int. Ed.*, 2022, **61**, e202114598



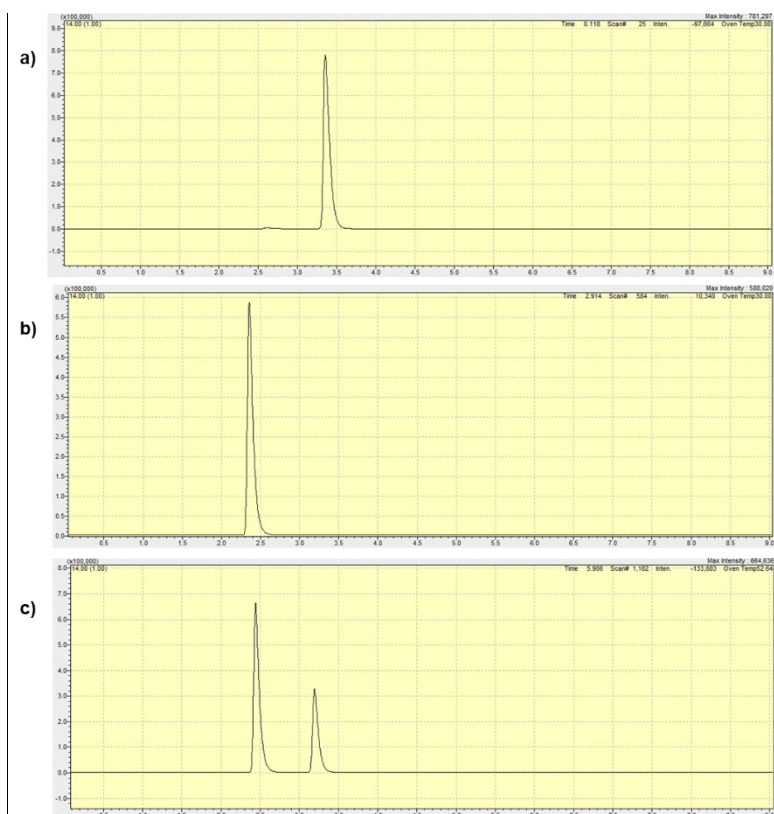

**Figure S1.**  $N_2$  determination by GC-MS: a) control experiment  $N_2O$ ; b) control experiment  $N_2$ ; c) catalytic reaction (Table 1, entry 4).

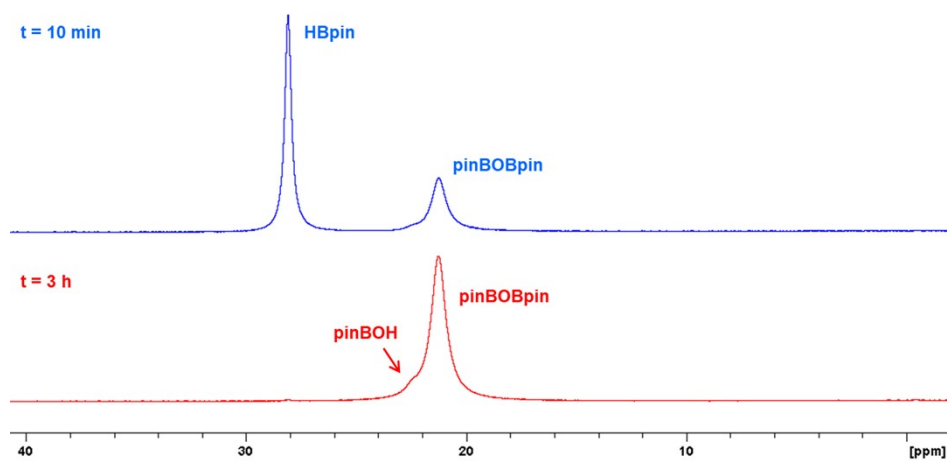

**Figure S2.**  $^{11}B\{^1H\}$  NMR spectrum (128 MHz) of the reaction of  $N_2O$  (2 bar) with pinacolborane in  $THF-d_6$  catalysed by **4a** (Table 1, entry 3).

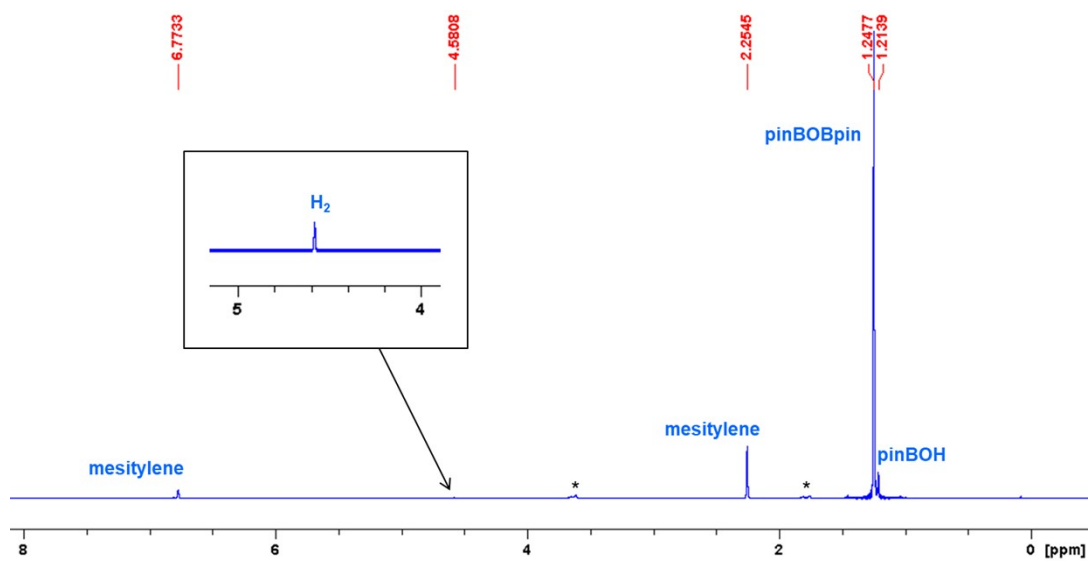

**Figure S3.** <sup>1</sup>H NMR spectrum (300 MHz) of the reaction of N<sub>2</sub>O (2 bar) with pinacolborane in THF-*d*<sub>8</sub> catalysed by **4a** (Table 1, entry 3). (\* solvent residual signals).

## 2. X-Ray structure analysis of complexes **3a** and **5b**

Crystals suitable for X-ray diffraction analysis were coated with dry perfluoropolyether, mounted on glass fibres, and fixed in a cold nitrogen stream to the goniometer head. Data collections<sup>[4]</sup> were performed on a Bruker-AXS, D8 Quest ECO diffractometer equipped with a micro-focus I $\mu$ S 3.0 source, using graphite monochromatized Mo radiation  $\lambda(\text{Mo K}\alpha) = 0.71073 \text{ \AA}$  and with an area detector Bruker Photon II 14 - CPAD. The data were reduced (*SAINT*) and corrected for absorption effects by the multiscan method (*SADABS*).<sup>[5]</sup> The structures were solved by direct methods (*SIR2002*, *SHELXS*)<sup>[6]</sup> and refined against all  $F^2$  data by full-matrix least-squares techniques (*SHELXL-2018/3*)<sup>[7]</sup> minimizing  $w[F_o^2 - F_c^2]^2$ . All non-hydrogen atoms were refined with anisotropic displacement parameters. Hydrogen atoms were included in calculated positions and allowed to ride on their carrier atoms with the isotropic temperature factors  $U_{\text{iso}}$  fixed at 1.2 times (1.5 times for methyl groups) of the  $U_{\text{eq}}$  values of the respective carrier atoms.

The crystal structure of **3a** crystallises in the centrosymmetric space group  $P2_1/c$ . In the crystal's asymmetric unit, only one salt of the Ni(II) complex is present, comprising the BPh<sub>4</sub> anion and the cationic CPN Ni(II) hydride complex. Both tert-butyl groups of the phosphine ligands exhibit disorder in the carbon atoms of the methyl groups. While these disorders did not necessitate explicit modelling, they did require the application of anisotropic displacement parameter (ADP) restraints. The crystal structure of **5b** crystallises in the centrosymmetric space group  $P4_2/n$ . In the asymmetric unit of this crystal, a single Ni(II) hydroxide complex is observed, revealing that the methylene bridge of the CNP pincer ligand is mono-deprotonated. A search for solvent accessible voids for this crystal structure **5b** using SQUEEZE<sup>[8]</sup> showed 2 small volumes of potential solvents of 179  $\text{\AA}^3$  for each, whose solvent content could not be identified or refined with the most severe restraints. The corresponding CIF data represent SQUEEZE treated structures with the solvent molecules handling as a diffuse contribution to the overall scattering, without specific atom position and excluded from the structural model. The SQUEEZE results were appended to the CIF. A summary of cell parameters, data collection, structure solution, and refinement for these two crystal structures are given in

<sup>4</sup> Bruker APEX3 software suite; Bruker AXS, Inc.; Madison, WI 53711, 2016.

<sup>5</sup> Bruker Advanced X-ray solutions. *SAINT* and *SADABS* programs. Bruker AXS Inc. Madison, WI 53711, **2012**.

<sup>6</sup> M. C. Burla, M. Camalli, B. Carrozzini, G. L. Casciarano, C. Giacovazzo, G. Polidori and R. Spagna, *J. Appl. Crystallogr.*, 2003, **36**, 1103–1104.

<sup>7</sup> G. M. Sheldrick, *Acta Crystallogr. Sect. A*, 2008, **64**, 112–122.

<sup>8</sup> P. v.d. Sluis, A. L. Spek, *Acta Crystallogr., Sect. A*, 1990, **46**, 194–201.

Tables S1 and S2. The corresponding crystallographic data were deposited with the Cambridge Crystallographic Data Centre as supplementary publications. CCDC 2299058 (**3a**) and CCDC 2299059 (**5b**) contain the supplementary crystallographic data for this paper. These data can be obtained free of charge from The Cambridge Crystallographic Data Centre via [www.ccdc.cam.ac.uk/data\\_request/cif](http://www.ccdc.cam.ac.uk/data_request/cif).

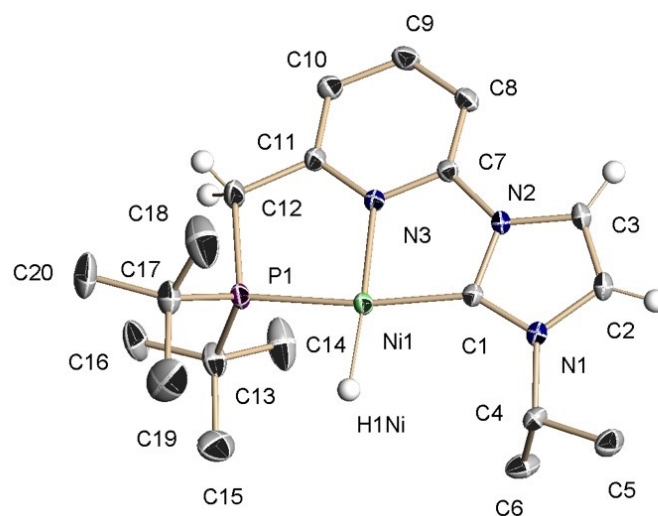

**Figure S4.** ORTEP view of molecular structure of complex **3a** with thermal ellipsoids depicted at the 30% probability level. Hydrogen atoms, with the exception of the Ni-hydride, NHC, and pincer linker hydrogens, have been omitted for clarity. Selected bond lengths [Å] and angles [°]: Ni(1)–C(1) 1.8852(13), Ni(1)–N(3) 1.9093(11), Ni(1)–P(1) 2.1533(4), Ni(1)–H(1HNi) 1.6212, C(1)–Ni(1)–N(3) 83.21(5), N(3)–Ni(1)–P(1) 87.35(4), C(1)–Ni(1)–H(1HNi) 99.6, P(1)–Ni(1)–H(1HNi) 89.9.

**Table S1.** Crystal data and structure refinement for **3a**.

|                                   |                                                                                         |                    |
|-----------------------------------|-----------------------------------------------------------------------------------------|--------------------|
| Empirical formula                 | C <sub>44</sub> H <sub>54</sub> BN <sub>3</sub> NiP                                     |                    |
|                                   | [C <sub>20</sub> H <sub>33</sub> N <sub>3</sub> NiP, C <sub>24</sub> H <sub>20</sub> B] |                    |
| Formula weight                    | 725.39                                                                                  |                    |
| Temperature                       | 193(2) K                                                                                |                    |
| Wavelength                        | 0.71073 Å                                                                               |                    |
| Crystal system                    | Monoclinic                                                                              |                    |
| Space group                       | P2 <sub>1</sub> /c                                                                      |                    |
| Unit cell dimensions              | a = 14.5193(4) Å                                                                        | α = 90°.           |
|                                   | b = 29.0183(7) Å                                                                        | β = 103.8940(10)°. |
|                                   | c = 9.5279(2) Å                                                                         | γ = 90°.           |
| Volume                            | 3896.89(17) Å <sup>3</sup>                                                              |                    |
| Z                                 | 4                                                                                       |                    |
| Density (calculated)              | 1.236 Mg/m <sup>3</sup>                                                                 |                    |
| Absorption coefficient            | 0.573 mm <sup>-1</sup>                                                                  |                    |
| F(000)                            | 1548                                                                                    |                    |
| Crystal size                      | 0.400 x 0.350 x 0.100 mm <sup>3</sup>                                                   |                    |
| Theta range for data collection   | 2.014 to 30.527°.                                                                       |                    |
| Index ranges                      | -20 ≤ h ≤ 20, -41 ≤ k ≤ 41, -13 ≤ l ≤ 13                                                |                    |
| Reflections collected             | 167470                                                                                  |                    |
| Independent reflections           | 11915 [R(int) = 0.0352]                                                                 |                    |
| Completeness to theta = 25.242°   | 99.9 %                                                                                  |                    |
| Absorption correction             | Semi-empirical from equivalent                                                          |                    |
| Max. and min. transmission        | 0.7461 and 0.4770                                                                       |                    |
| Refinement method                 | Full-matrix least-squares on F <sup>2</sup>                                             |                    |
| Data / restraints / parameters    | 11915 / 36 / 459                                                                        |                    |
| Goodness-of-fit on F <sup>2</sup> | 1.039                                                                                   |                    |
| Final R indices [I > 2σ(I)]       | R1 = 0.0392, wR2 = 0.1093                                                               |                    |
| R indices (all data)              | R1 = 0.0448, wR2 = 0.1139                                                               |                    |
| Extinction coefficient            | n/a                                                                                     |                    |
| Largest diff. peak and hole       | 0.990 and -0.476 e.Å <sup>-3</sup>                                                      |                    |

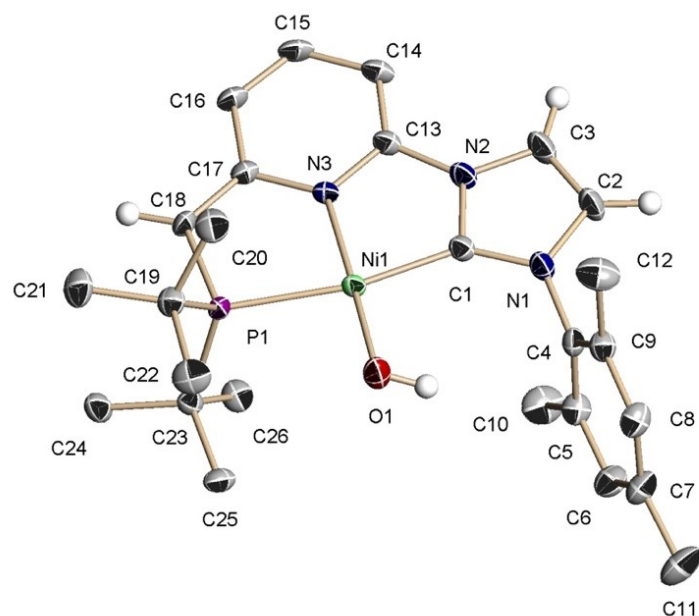

**Figure S5.** ORTEP view of molecular structure of complex **5b** with thermal ellipsoids depicted at the 30% probability level. Hydrogen atoms, except Ni-hydroxyl, NHC, and one pincer linker hydrogen, have been omitted for clarity. Selected bond lengths [Å] and angles [°]: Ni(1)–C(1) 1.905(2), Ni(1)–N(3) 1.8839(19), Ni(1)–P(1) 2.2246(7), Ni(1)–O(1) 1.8272(18), C(1)–Ni(1)–N(3) 82.05(9), N(3)–Ni(1)–P(1) 84.84(6), C(1)–Ni(1)–O(1) 99.89(9), P(1)–Ni(1)–O(1) 93.35(6).

**Table S2.** Crystal data and structure refinement for **5b**.

|                                   |                                                     |          |
|-----------------------------------|-----------------------------------------------------|----------|
| Empirical formula                 | C <sub>26</sub> H <sub>36</sub> N <sub>3</sub> NiOP |          |
| Formula weight                    | 496.26                                              |          |
| Temperature                       | 193(2) K                                            |          |
| Wavelength                        | 0.71073 Å                                           |          |
| Crystal system                    | Tetragonal                                          |          |
| Space group                       | P4 <sub>2</sub> /n                                  |          |
| Unit cell dimensions              | a = 21.355(2) Å                                     | α = 90°. |
|                                   | b = 21.355(2) Å                                     | β = 90°. |
|                                   | c = 11.6688(15) Å                                   | γ = 90°. |
| Volume                            | 5321.2(14) Å <sup>3</sup>                           |          |
| Z                                 | 8                                                   |          |
| Density (calculated)              | 1.239 Mg/m <sup>3</sup>                             |          |
| Absorption coefficient            | 0.811 mm <sup>-1</sup>                              |          |
| F(000)                            | 2112                                                |          |
| Crystal size                      | 0.200 x 0.100 x 0.080 mm <sup>3</sup>               |          |
| Theta range for data collection   | 1.907 to 25.237°.                                   |          |
| Index ranges                      | -25 ≤ h ≤ 25, -25 ≤ k ≤ 25, -14 ≤ l ≤ 14            |          |
| Reflections collected             | 175281                                              |          |
| Independent reflections           | 4813 [R(int) = 0.0908]                              |          |
| Completeness to theta = 25.237°   | 100.0 %                                             |          |
| Absorption correction             | Semi-empirical from equivalents                     |          |
| Max. and min. transmission        | 0.7461 and 0.6756                                   |          |
| Refinement method                 | Full-matrix least-squares on F <sup>2</sup>         |          |
| Data / restraints / parameters    | 4813 / 0 / 299                                      |          |
| Goodness-of-fit on F <sup>2</sup> | 1.039                                               |          |
| Final R indices [I > 2σ(I)]       | R1 = 0.0373, wR2 = 0.0932                           |          |
| R indices (all data)              | R1 = 0.0463, wR2 = 0.0974                           |          |
| Extinction coefficient            | n/a                                                 |          |
| Largest diff. peak and hole       | 0.898 and -0.456 e.Å <sup>-3</sup>                  |          |

### 3. Selected NMR spectra of nickel complexes

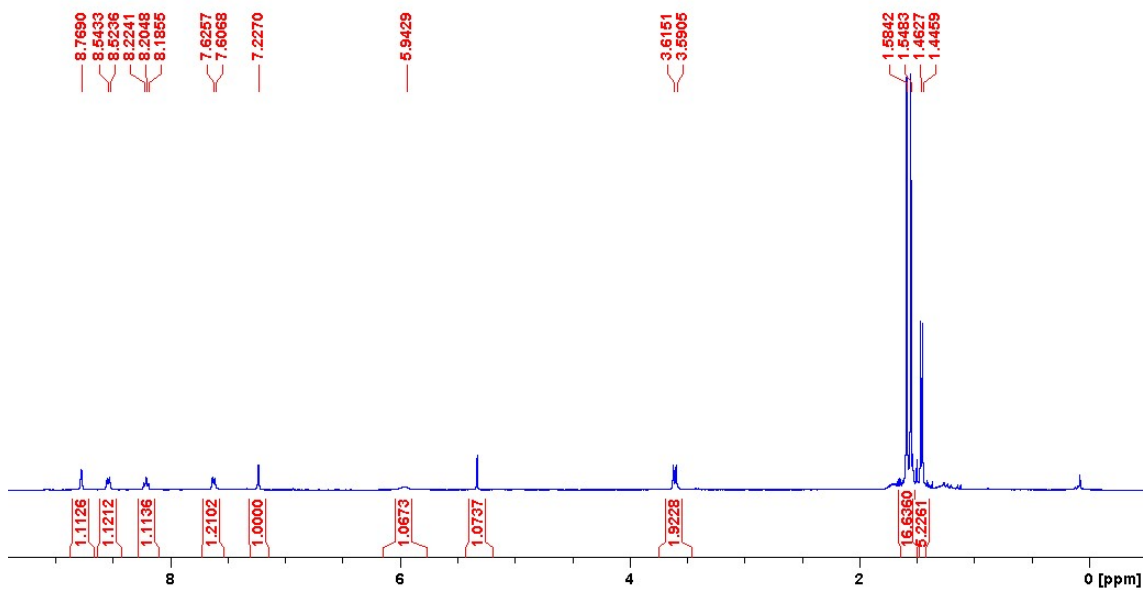

Figure S6. <sup>1</sup>H NMR spectrum (400 MHz) of **2a** in CD<sub>2</sub>Cl<sub>2</sub>.

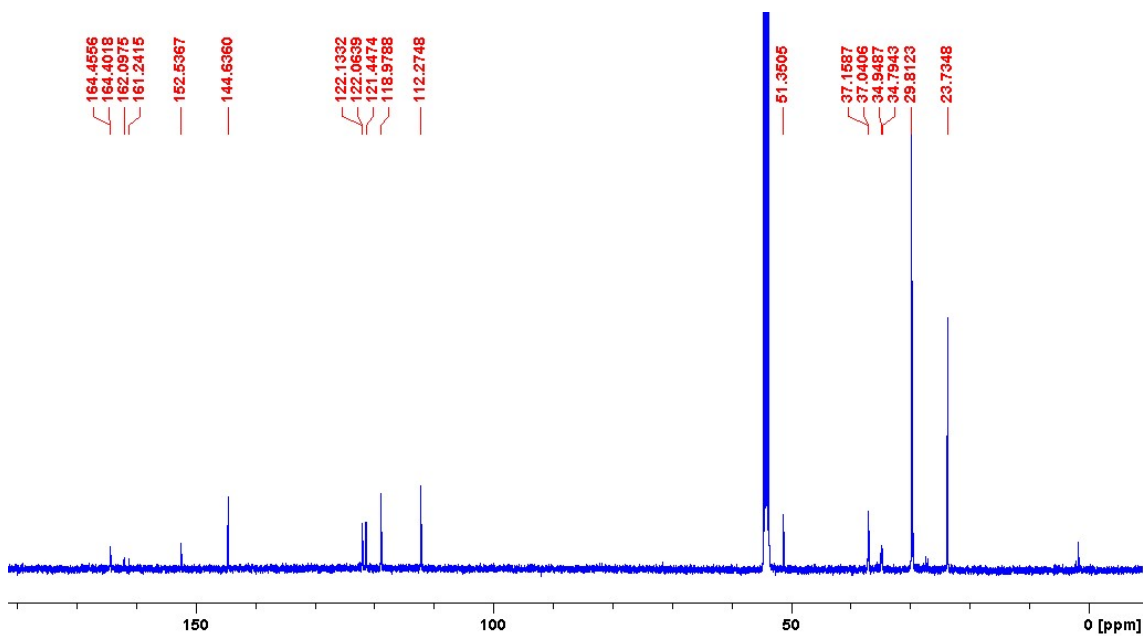

Figure S7. <sup>13</sup>C{<sup>1</sup>H} NMR spectrum (101 MHz) of **2a** in CD<sub>2</sub>Cl<sub>2</sub>.



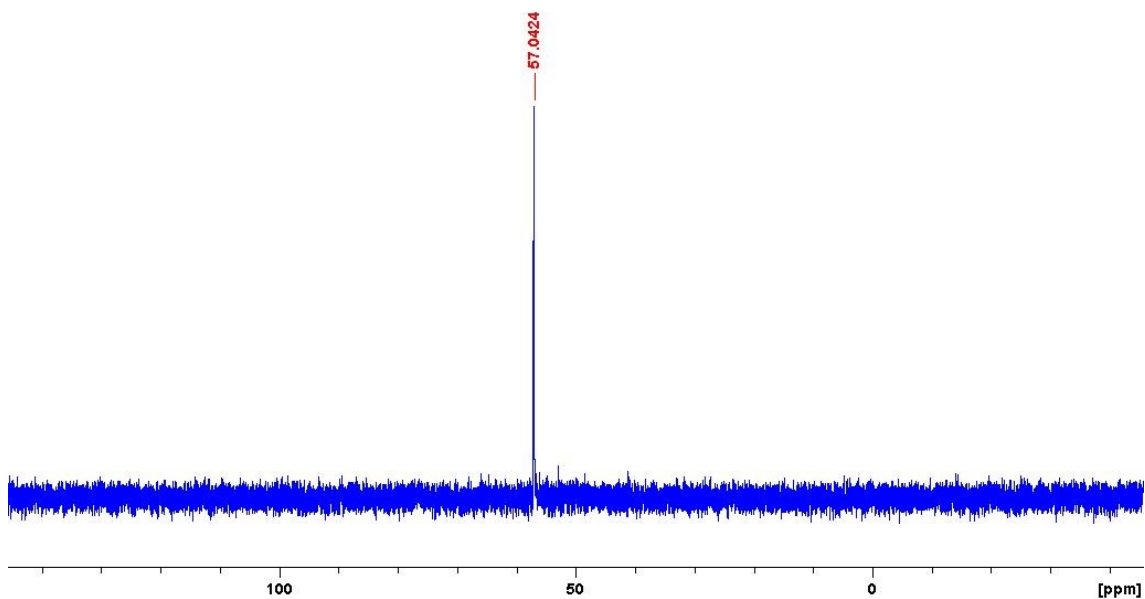

**Figure S8.** <sup>31</sup>P{<sup>1</sup>H} NMR spectrum (162 MHz) of **2a** in THF-*d*<sub>8</sub>.

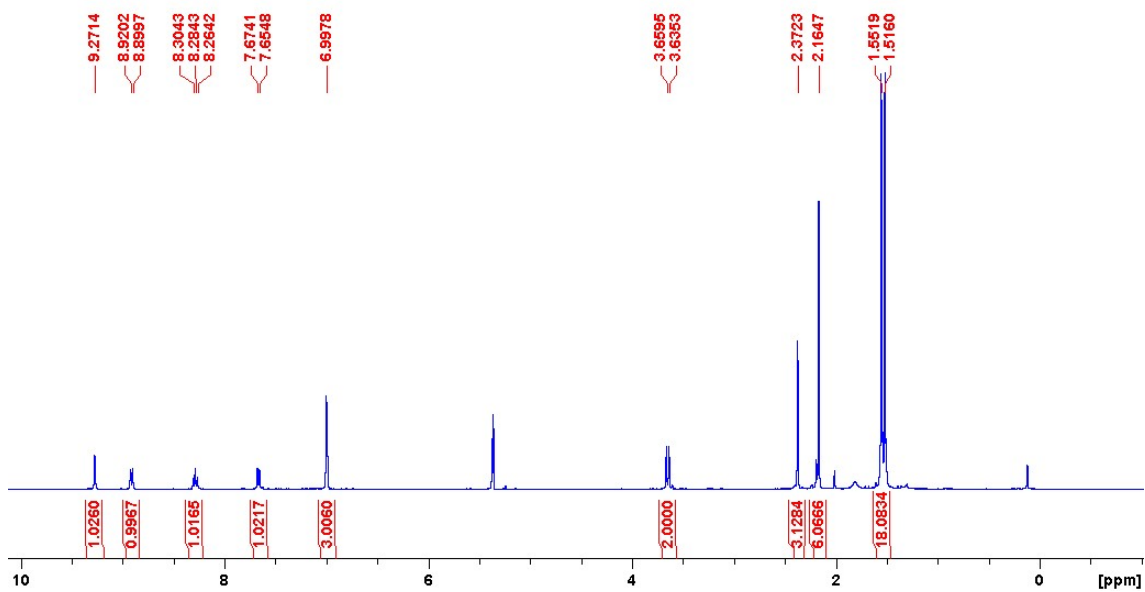

**Figure S9.** <sup>1</sup>H NMR spectrum (400 MHz) of **2b** in CD<sub>2</sub>Cl<sub>2</sub>.

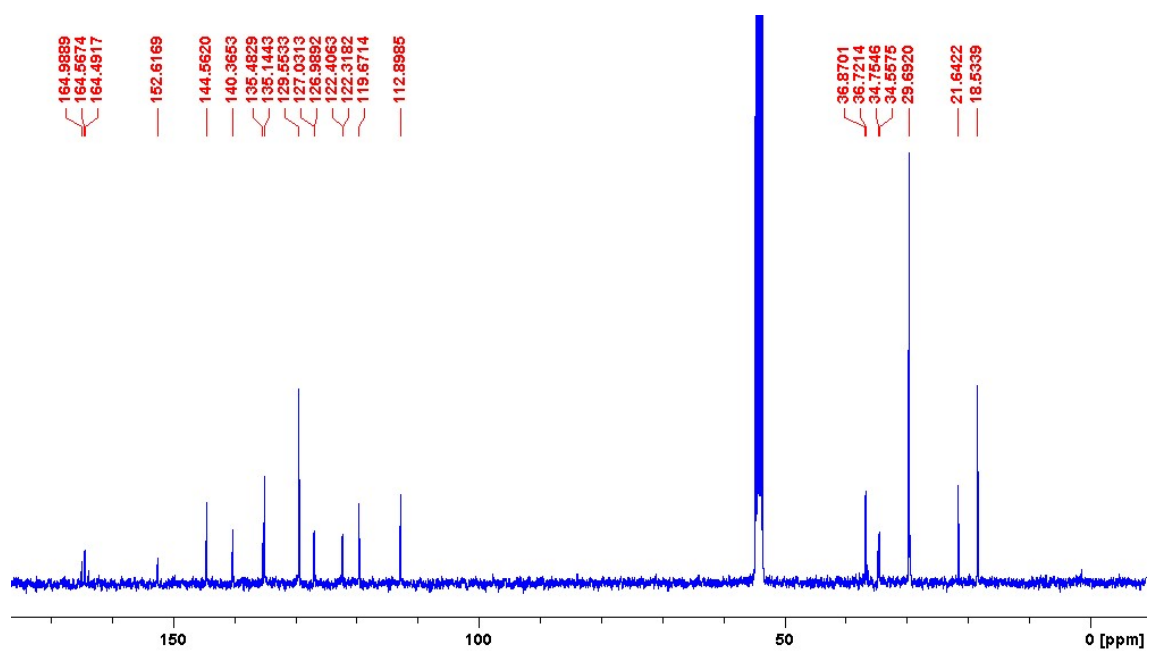

**Figure S10.**  $^{13}\text{C}\{^1\text{H}\}$  NMR spectrum (101 MHz) of **2b** in  $\text{CD}_2\text{Cl}_2$ .

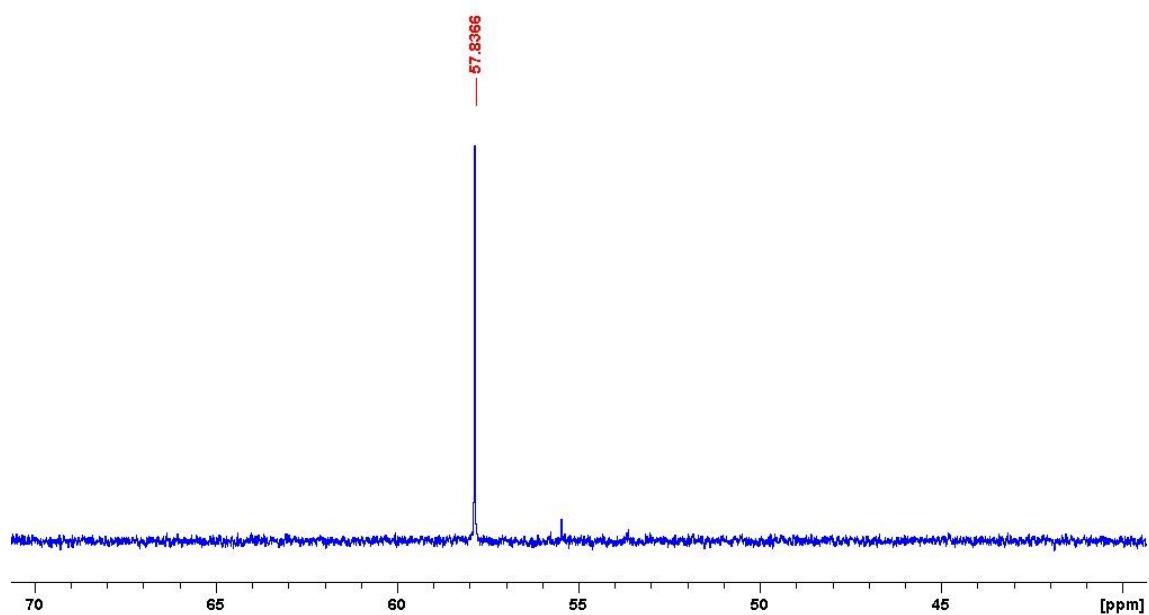

**Figure S11.**  $^{31}\text{P}\{^1\text{H}\}$  NMR spectrum (162 MHz) of **2b** in  $\text{CD}_3\text{CN}$ .

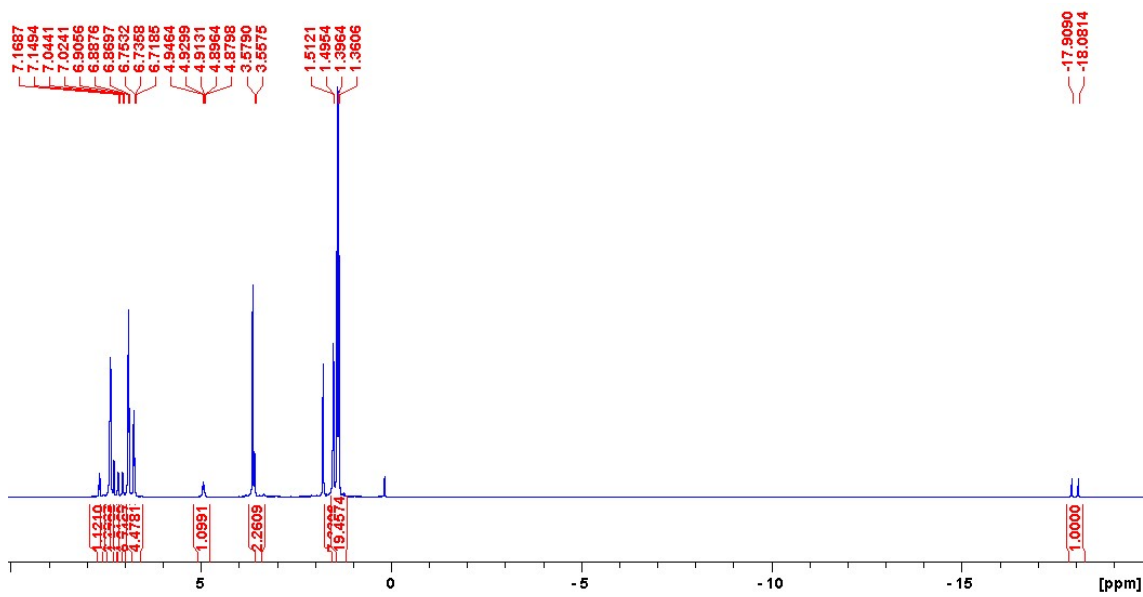

Figure S12.  $^1\text{H}$  NMR spectrum (400 MHz) of **3a** in  $\text{THF-}d_8$ .

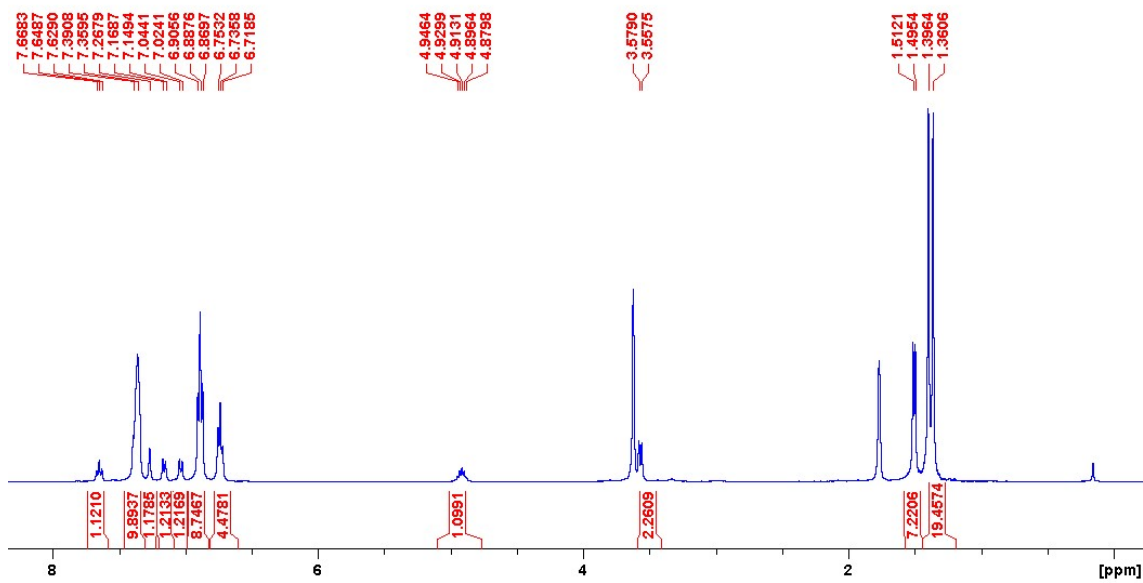

Figure S13. Region (0.0 - 8.0 ppm) of the  $^1\text{H}$  NMR spectrum (400 MHz) of **3a** in  $\text{THF-}d_8$ .

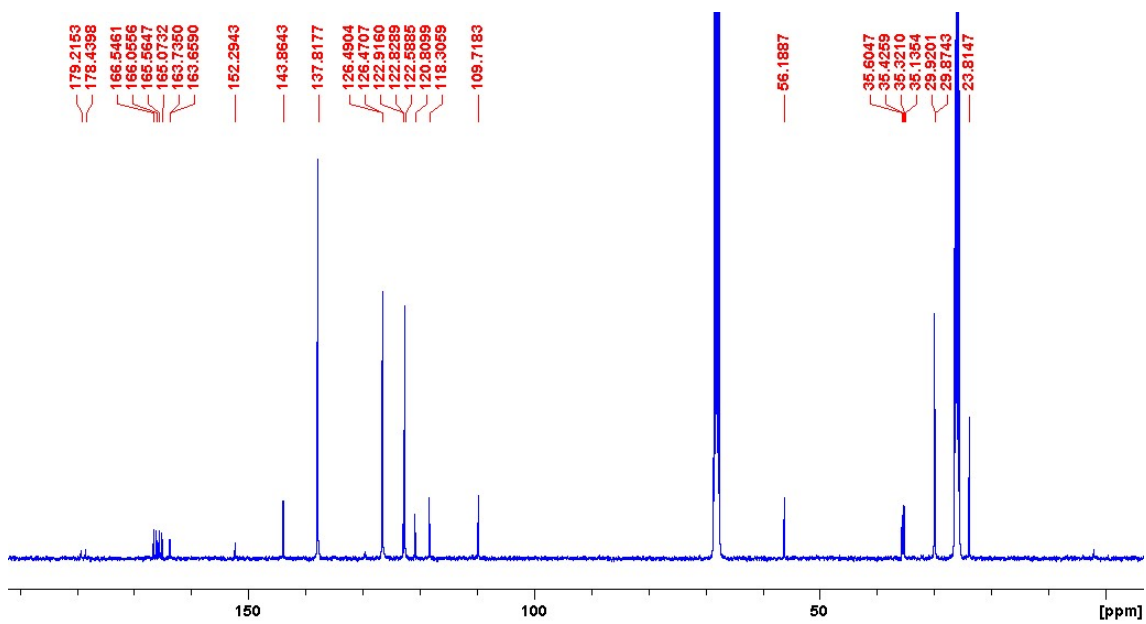

**Figure S14.**  $^{13}\text{C}\{^1\text{H}\}$  NMR spectrum (101 MHz) of **3a** in  $\text{THF-}d_8$ .

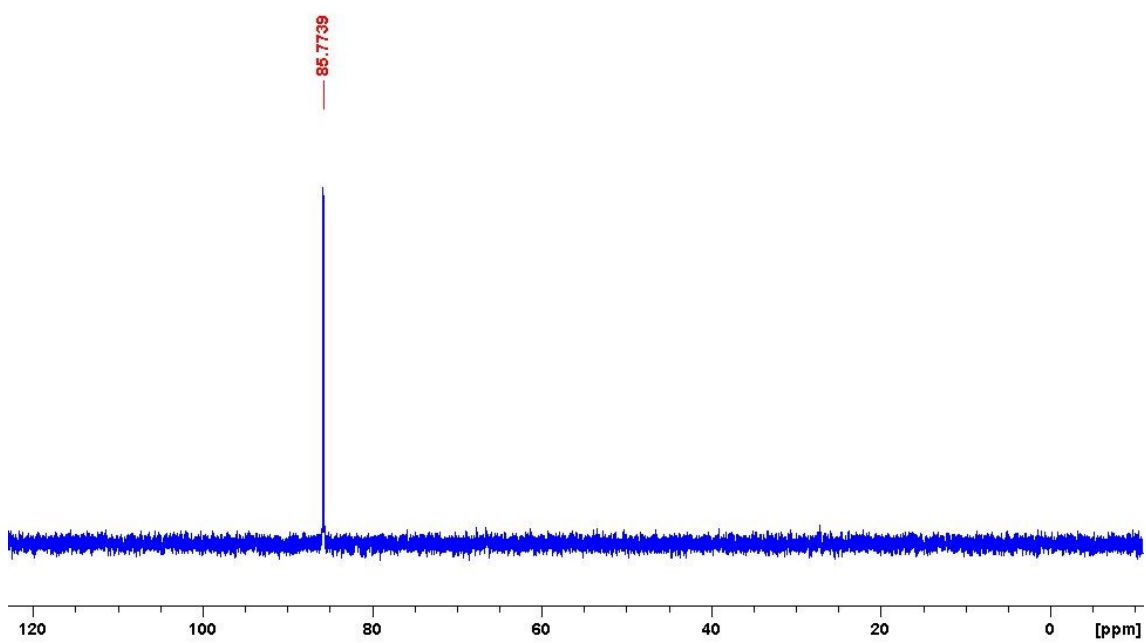

**Figure S15.**  $^{31}\text{P}\{^1\text{H}\}$  NMR spectrum (162 MHz) of **3a** in  $\text{THF-}d_8$ .

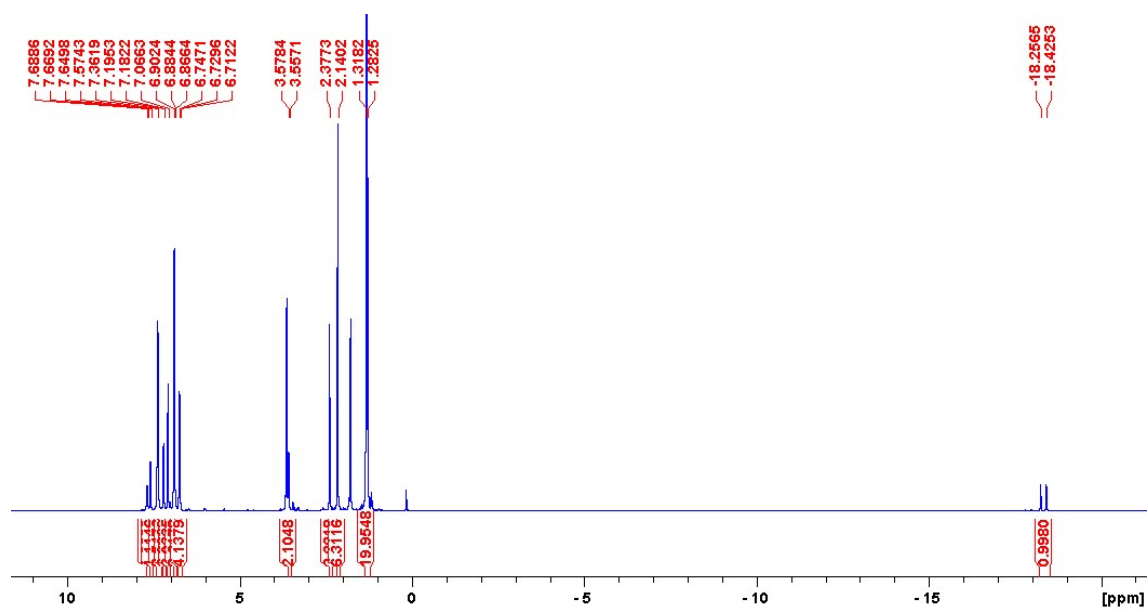

Figure S16.  $^1\text{H}$  NMR spectrum (400 MHz) of **3b** in  $\text{THF-}d_8$ .

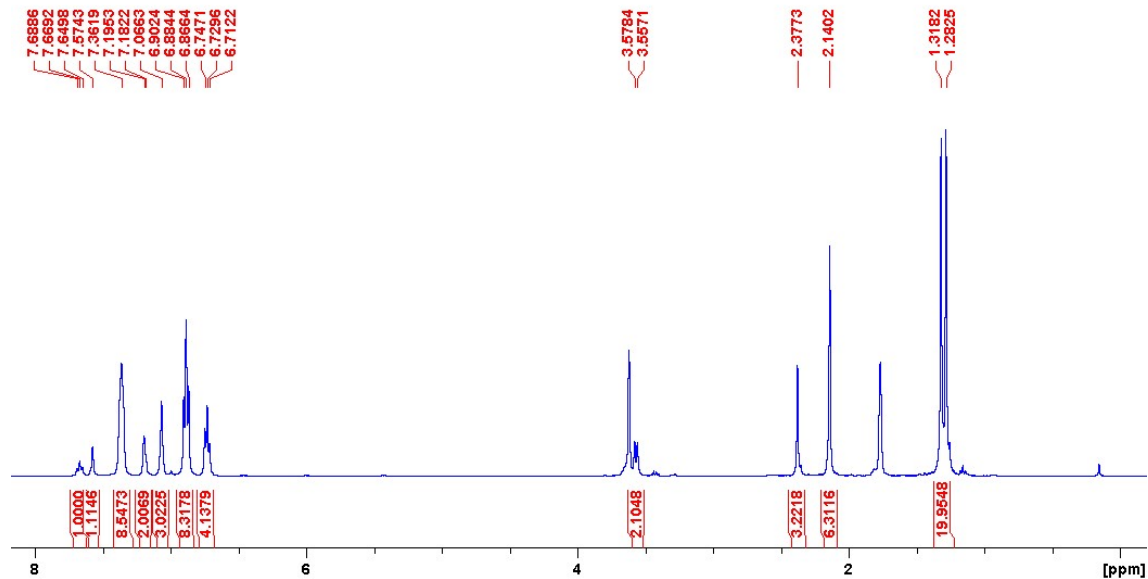

Figure S17. Region (0.0-8.0 ppm) of the  $^1\text{H}$  NMR spectrum (400 MHz) of **3b** in  $\text{THF-}d_8$ .

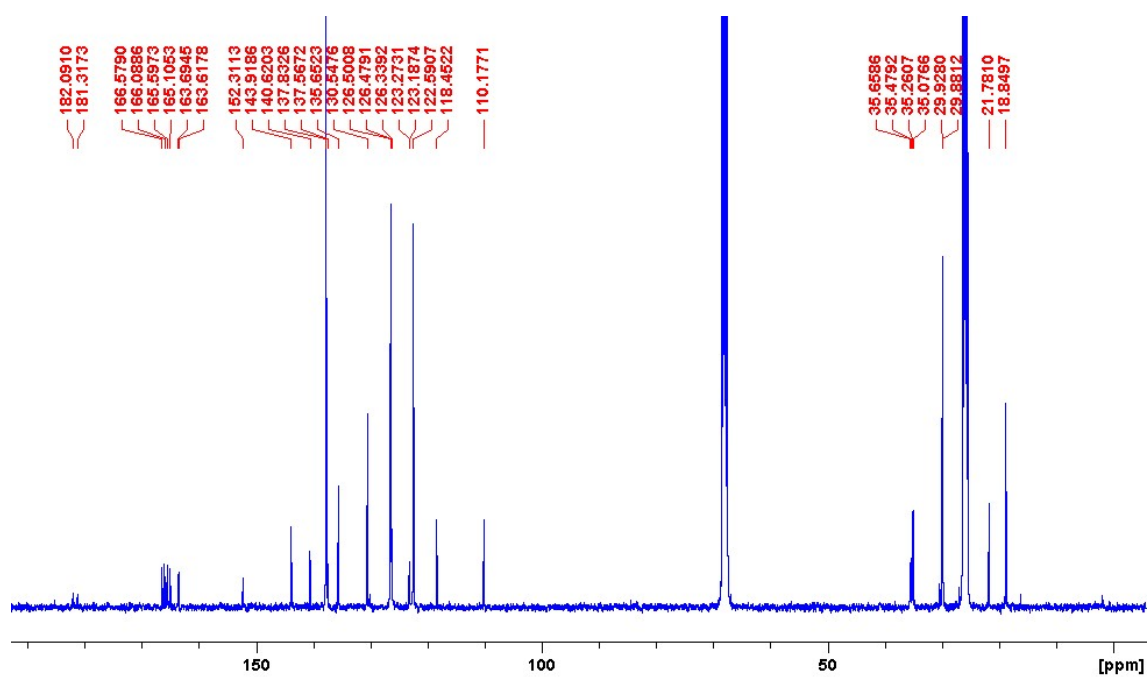

**Figure S18.**  $^{13}\text{C}\{^1\text{H}\}$  NMR spectrum (101 MHz) of **3b** in  $\text{THF-}d_8$ .

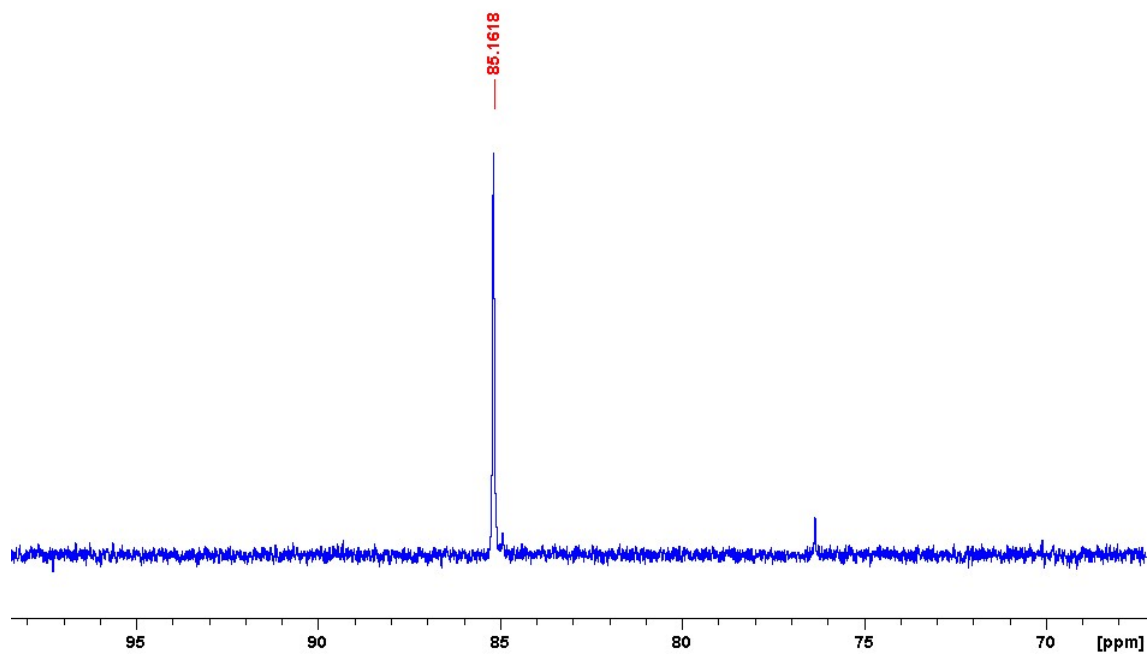

**Figure S19.**  $^{31}\text{P}\{^1\text{H}\}$  NMR spectrum (162 MHz) of **3b** in  $\text{CD}_3\text{CN}$ .

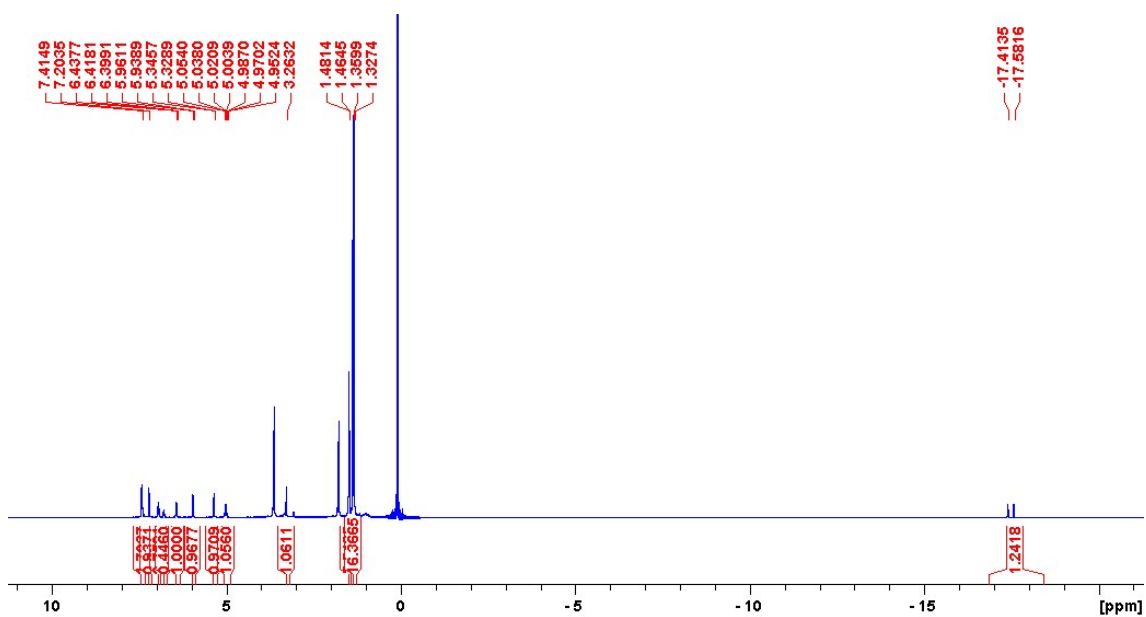

**Figure S20.**  $^1\text{H}$  NMR spectrum (400 MHz) of **4a** in  $\text{THF-d}_8$  (contains signals corresponding to the  $\text{BPh}_4^-$  anion and HMDS).

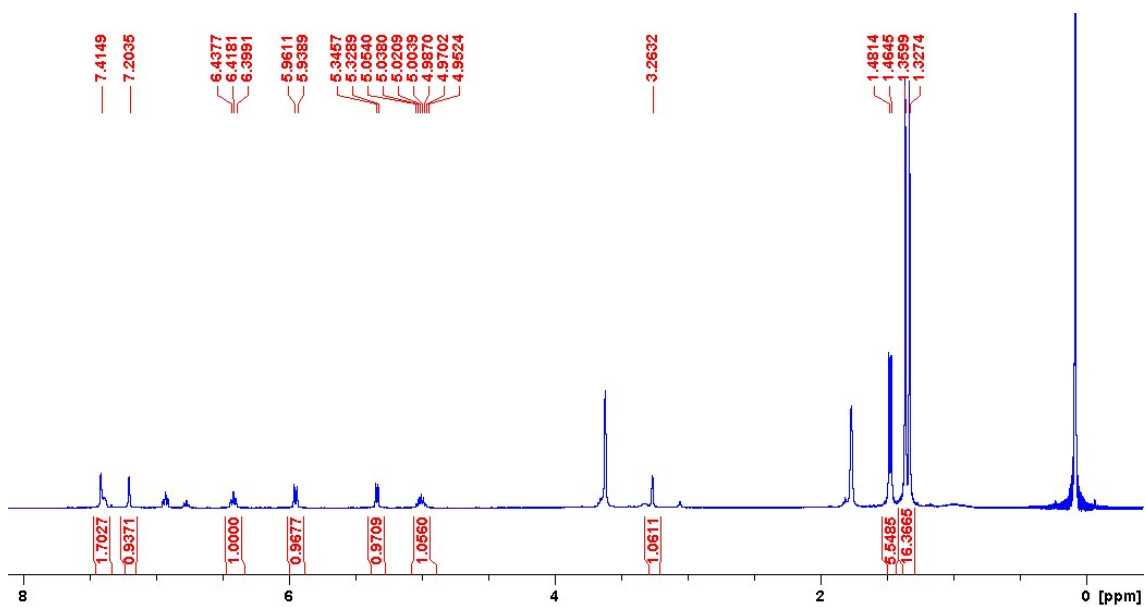

**Figure S21.** Region (0.0-8.0 ppm) of the  $^1\text{H}$  NMR spectrum (400 MHz) of **4a** in  $\text{THF-d}_8$  (contains signals corresponding to the  $\text{BPh}_4^-$  anion and HMDS).

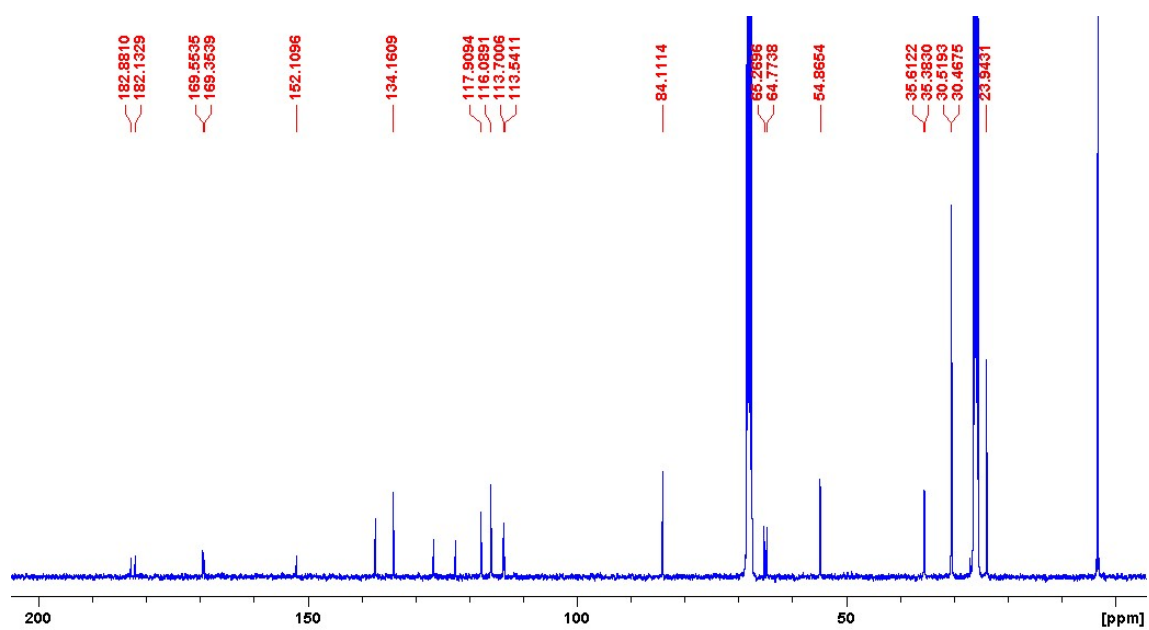

**Figure S22.**  $^{13}\text{C}\{^1\text{H}\}$  NMR spectrum (101 MHz) of **4a** in  $\text{THF-}d_8$  (contains signals corresponding to the  $\text{BPh}_4^-$  anion and HMDS).

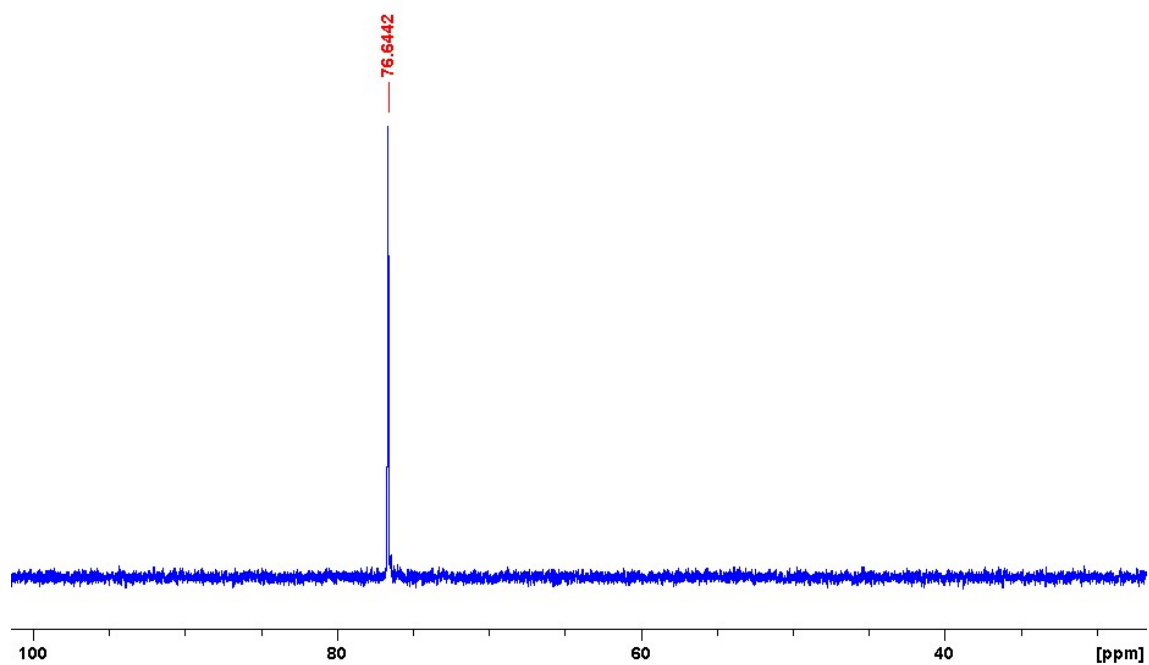

**Figure S23.**  $^{31}\text{P}\{^1\text{H}\}$  NMR spectrum (162 MHz) of **4a** in  $\text{THF-}d_8$ .



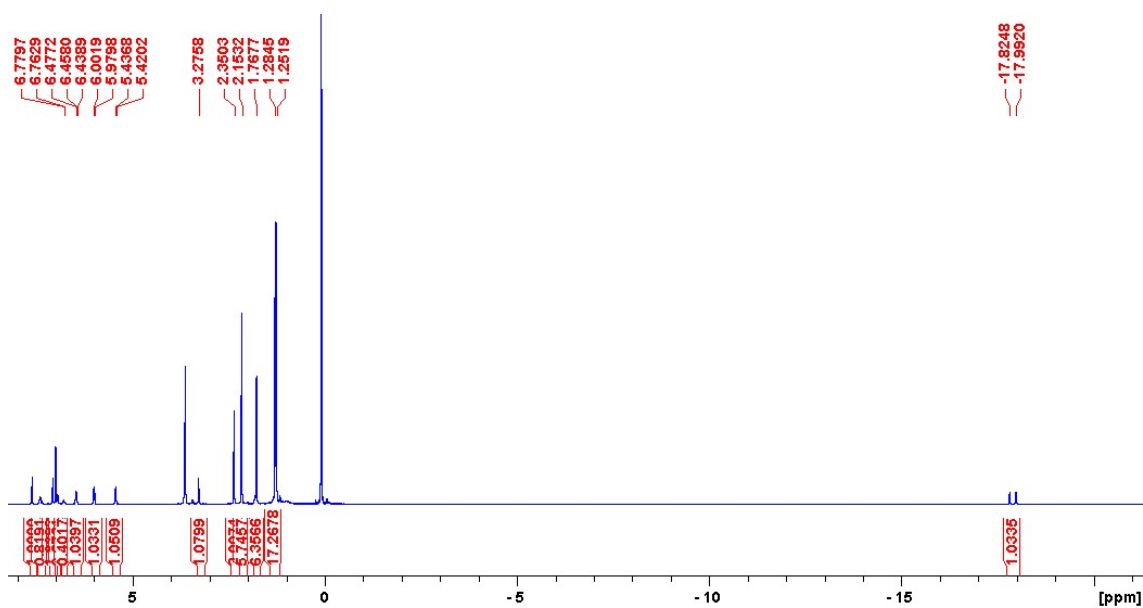

**Figure S24.**  $^1\text{H}$  NMR spectrum (400 MHz) of **4b** in  $\text{THF-}d_8$  (contains signals corresponding to the  $\text{BPh}_4^-$  anion and HMDS).

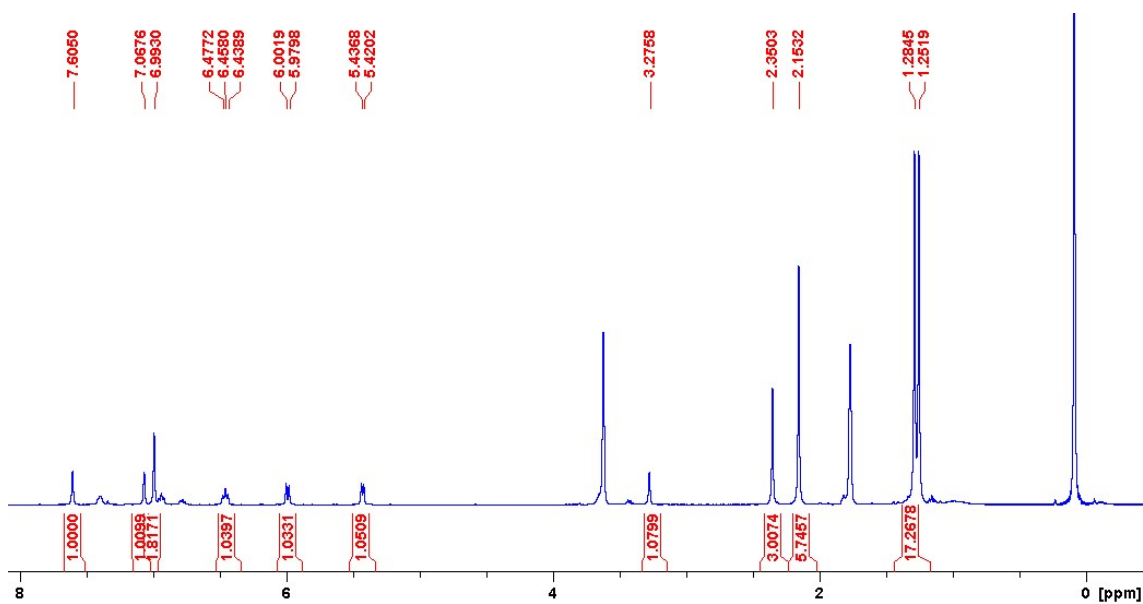

**Figure S25.** Region (0.0 to 8.0 ppm) of the  $^1\text{H}$  NMR spectrum (400 MHz) of **4b** in  $\text{THF-}d_8$  (contains signals corresponding to the  $\text{BPh}_4^-$  anion and HMDS).

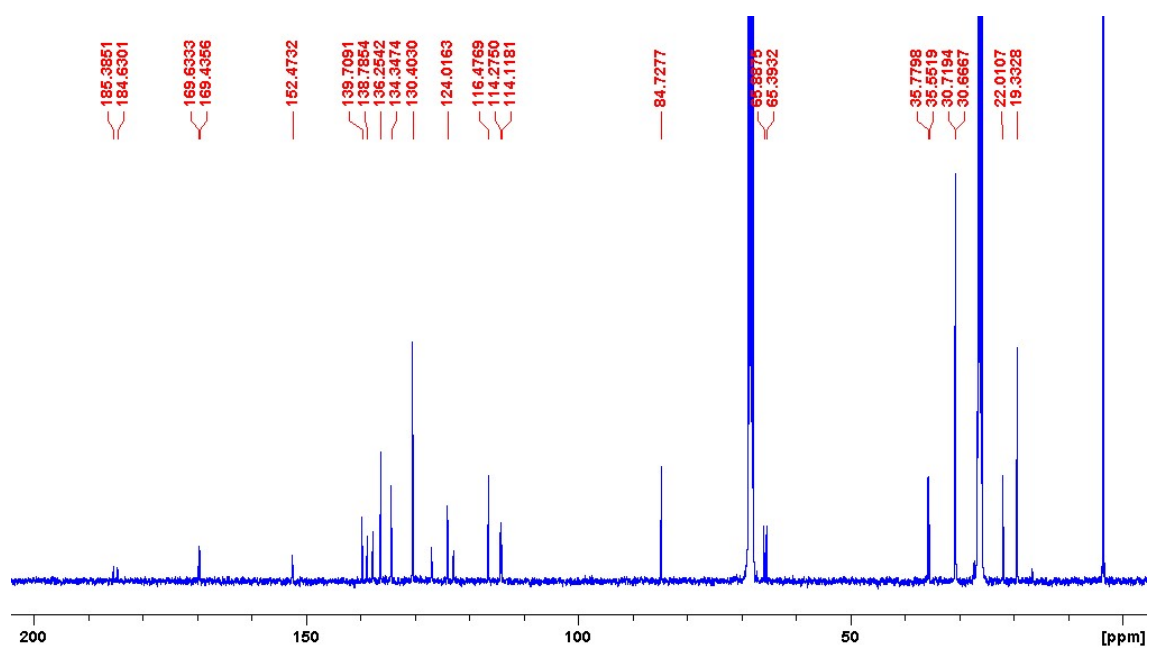

**Figure S26.**  $^{13}\text{C}\{^1\text{H}\}$  NMR spectrum (101 MHz) of **4b** in  $\text{THF-}d_8$  (contains signals corresponding to the  $\text{BPh}_4^-$  anion and HMDS).

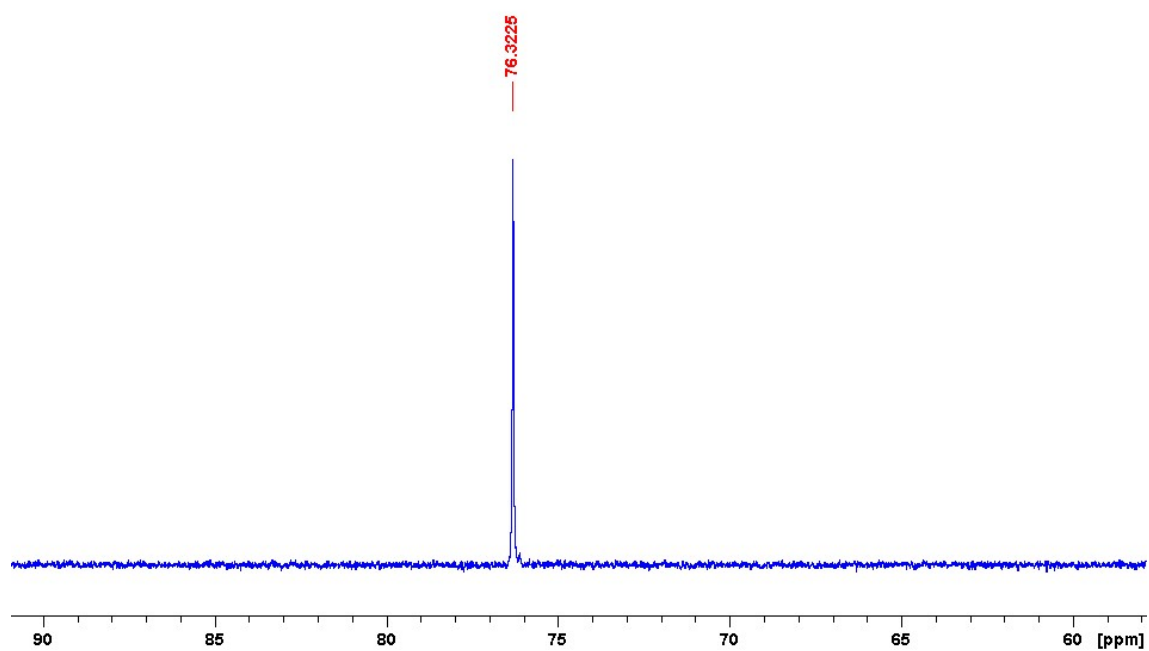

**Figure S27.**  $^{31}\text{P}\{^1\text{H}\}$  NMR spectrum (162 MHz) of **4b** in  $\text{THF-}d_8$ .

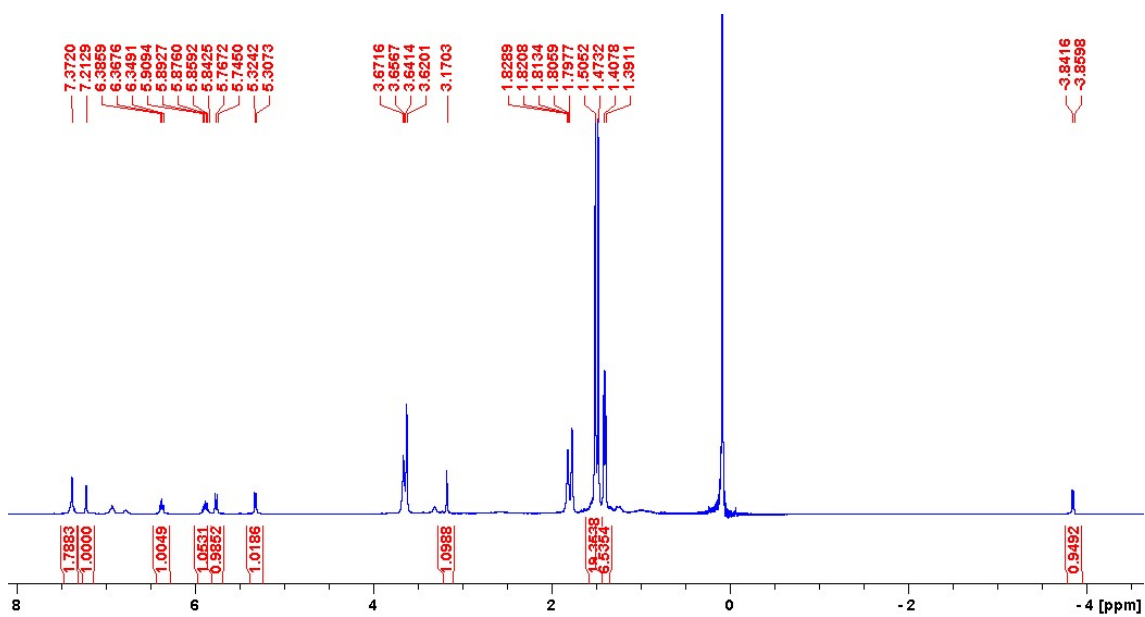

**Figure S28.**  $^1\text{H}$  NMR spectrum (400 MHz) of **5a** in  $\text{THF-}d_8$  (contains signals corresponding to the  $\text{BPh}_4^-$  anion and HMDS).

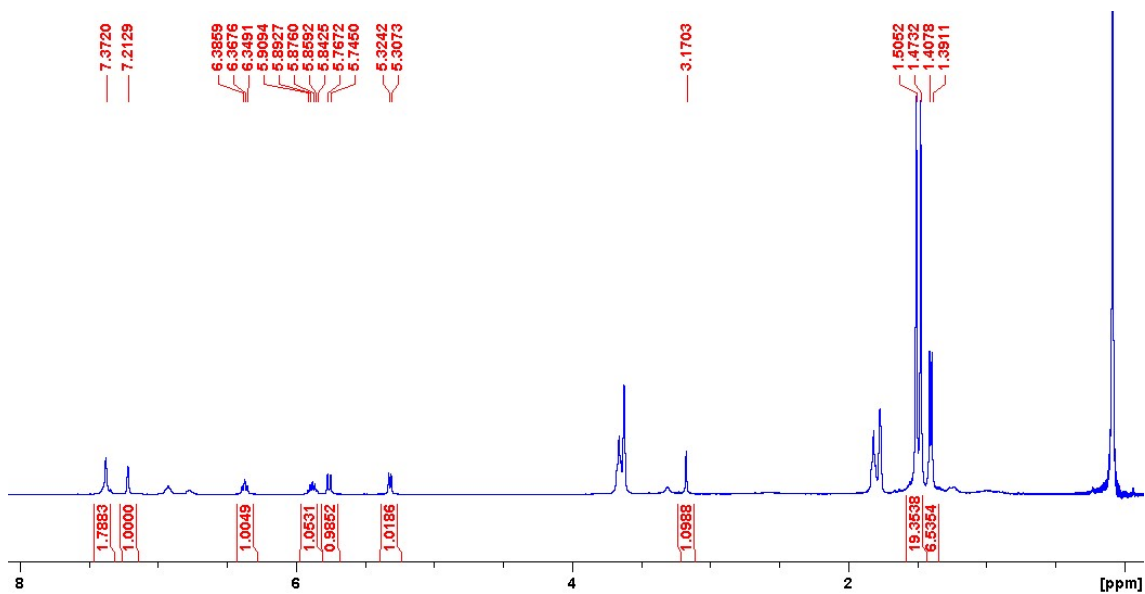

**Figure S29.** Region (0.0-8.0 ppm) of the  $^1\text{H}$  NMR spectrum (400 MHz) of **5a** in  $\text{THF-}d_8$  (contains signals corresponding to the  $\text{BPh}_4^-$  anion and HMDS).

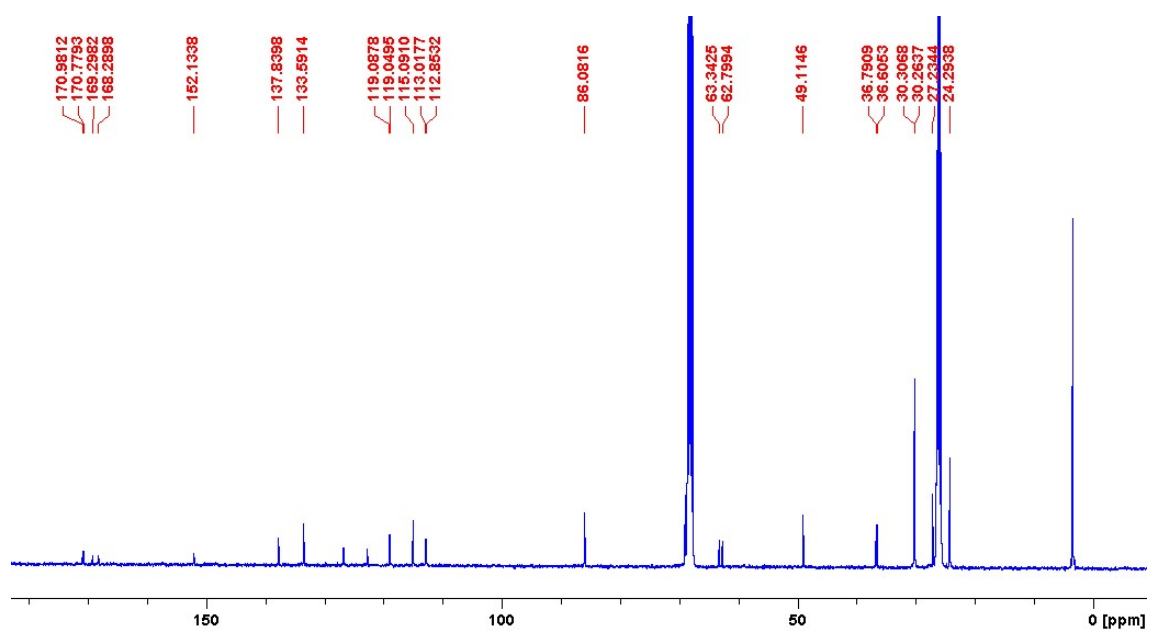

**Figure S30.**  $^{13}\text{C}\{^1\text{H}\}$  NMR spectrum (101 MHz) of **5a** in  $\text{THF-}d_8$  (contains signals corresponding to the  $\text{BPh}_4^-$  anion and HMDS).

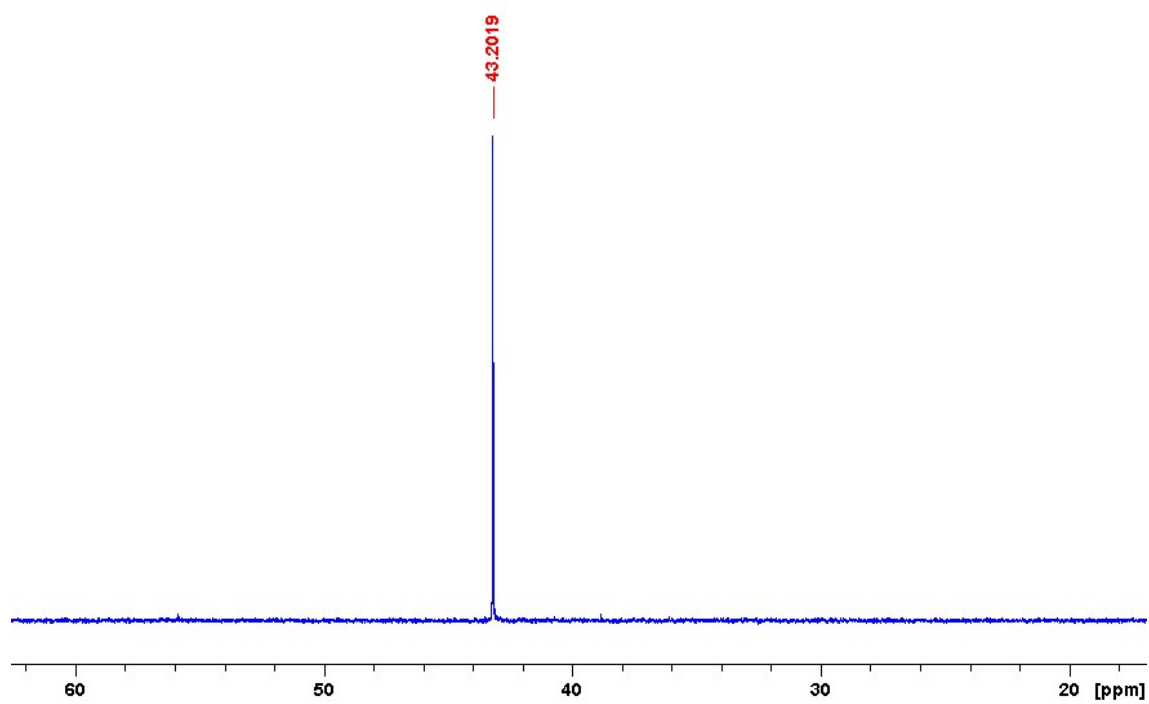

**Figure S31.**  $^{31}\text{P}\{^1\text{H}\}$  NMR spectrum (162 MHz) of **5a** in  $\text{THF-}d_8$ .

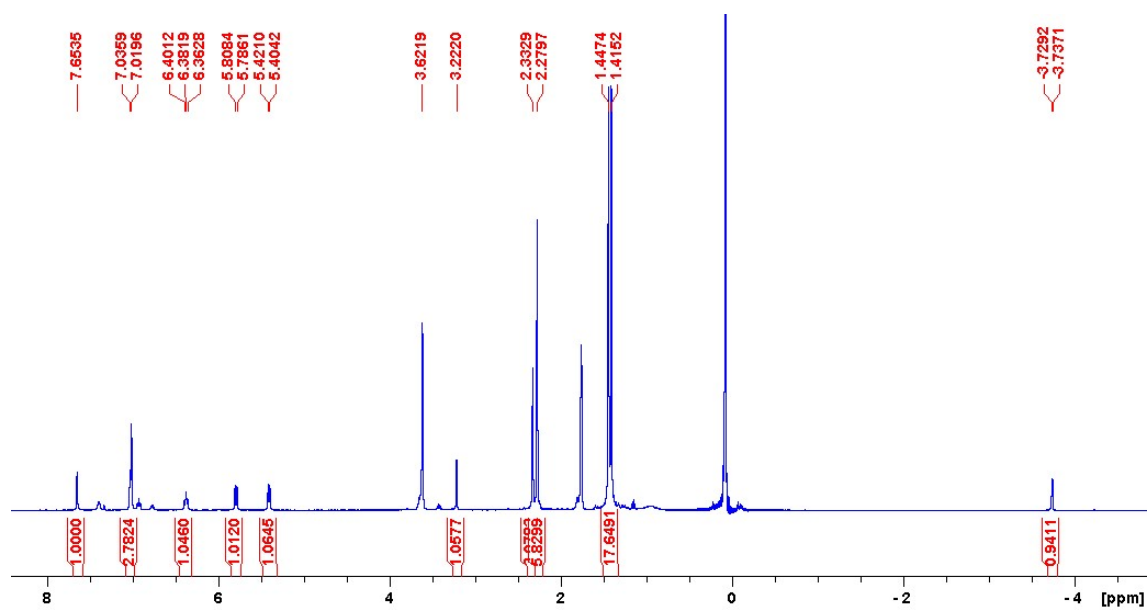

**Figure S32.**  $^1\text{H}$  NMR spectrum (400 MHz) of **5b** in  $\text{THF-}d_8$  (contains signals corresponding to the  $\text{BPh}_4^-$  anion and HMDS).

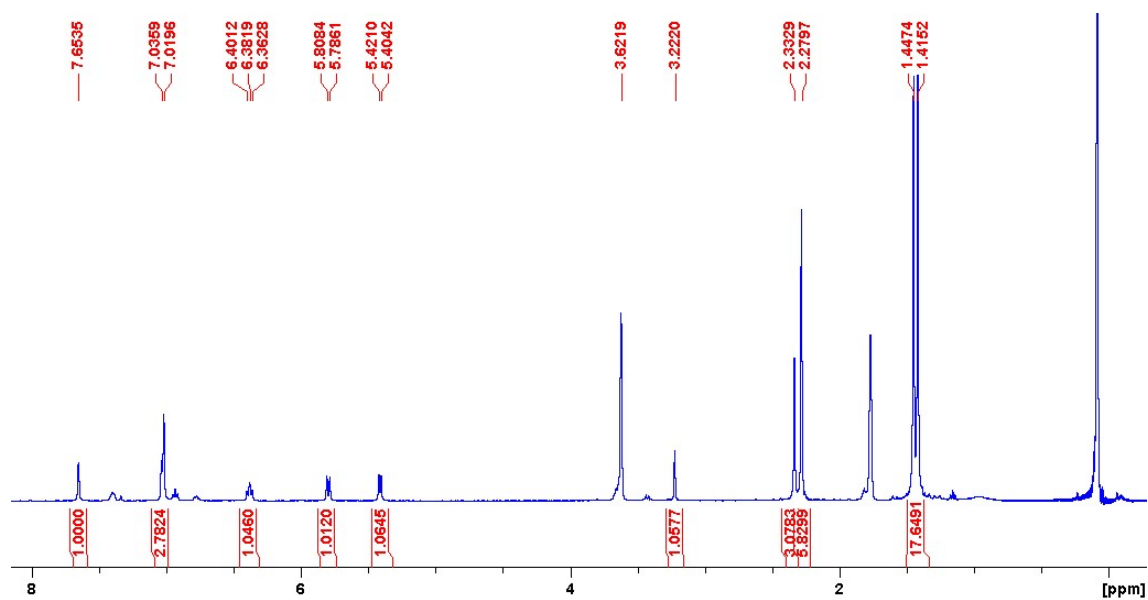

**Figure S33.** Region (0.0-8.0 ppm) of the  $^1\text{H}$  NMR spectrum (400 MHz) of **5b** in  $\text{THF-}d_8$  (contains signals corresponding to the  $\text{BPh}_4^-$  anion and HMDS).

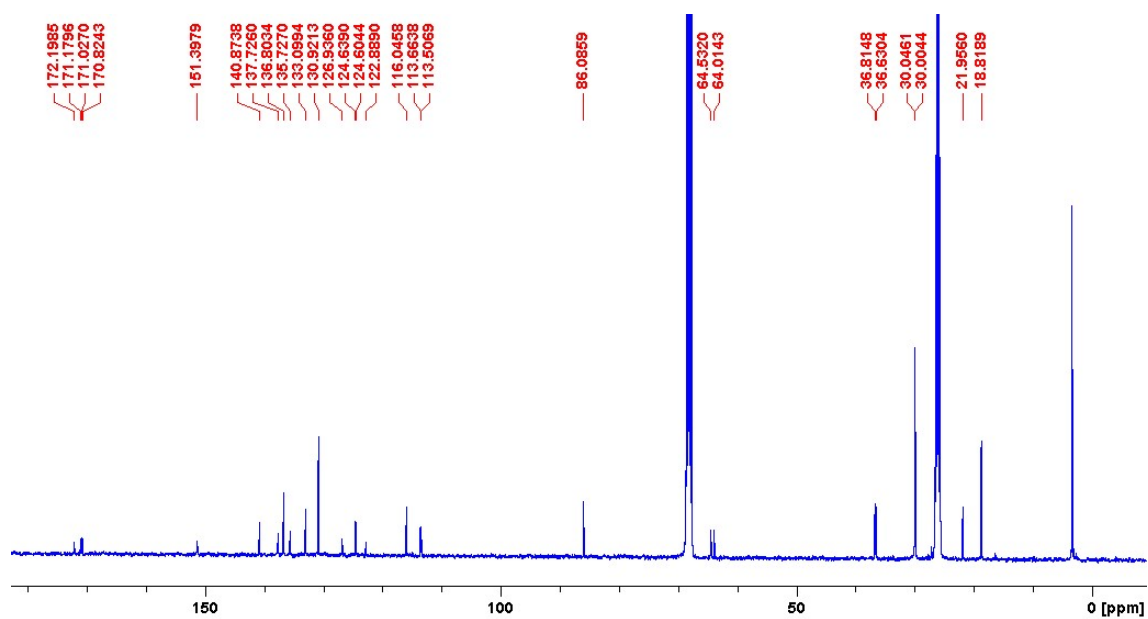

**Figure S34.**  $^{13}\text{C}\{^1\text{H}\}$  NMR spectrum (101 MHz) of **5b** in  $\text{THF-}d_8$  (contains signals corresponding to the  $\text{BPh}_4^-$  anion and HMDS).

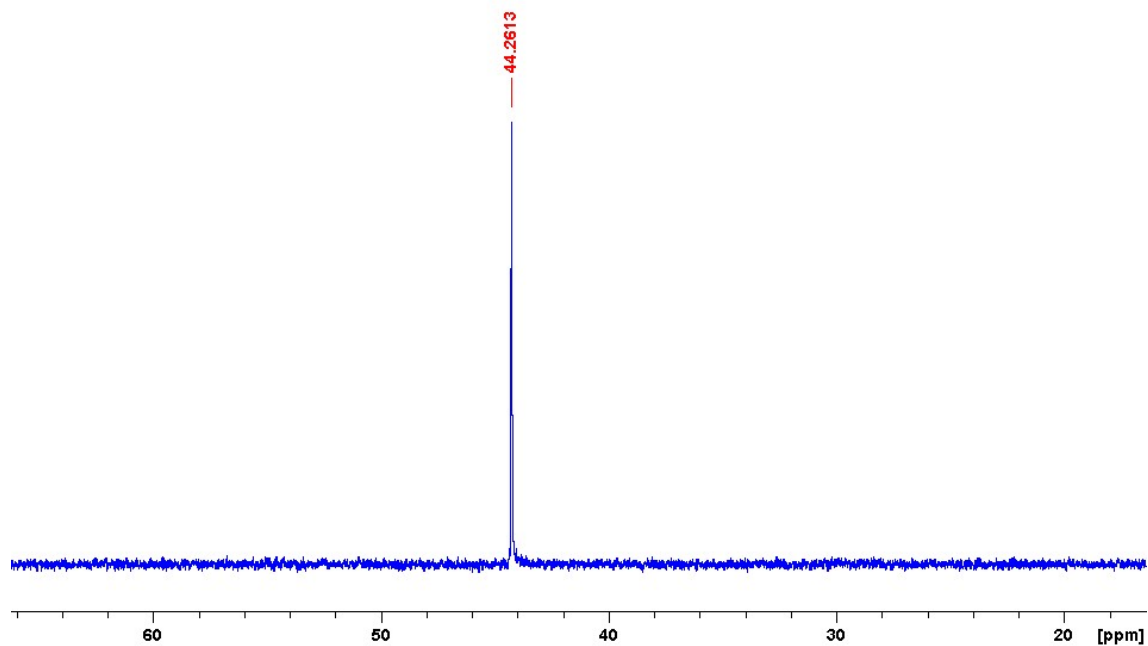

**Figure S35.**  $^{31}\text{P}\{^1\text{H}\}$  NMR spectrum (162 MHz) of **5b** in  $\text{THF-}d_8$ .

#### 4. DFT calculations

Calculations were carried out at the DFT level using the Gaussian 09 program<sup>[9]</sup> with the B3LYP hybrid functional,<sup>[10]</sup> with dispersion effects taken into account by adding the D3 version of Grimme's empirical dispersion.<sup>[11]</sup> All atoms were represented with the Def2TZVP basis set.<sup>[12]</sup> All geometry optimizations were performed in bulk solvent (THF) without restrictions. Vibrational analysis was used to characterise the stationary points in the potential energy surface, as well as for calculating the zero-point, enthalpy, and Gibbs energy corrections at 295 K and 1 atm. The nature of the intermediates connected by a given transition state along a reaction path was proven by intrinsic reaction coordinate (IRC) calculations or by perturbing the geometry of the TS along the reaction path eigenvector. Bulk solvent effects were modelled with the SMD continuum model.<sup>[13]</sup>

---

<sup>9</sup> Frisch, M. J.; Trucks, G. W.; Schlegel, H. B.; Scuseria, G. E.; Robb, M. A.; Cheeseman, J. R.; Scalmani, G.; Barone, V.; Petersson, G. A.; Nakatsuji, H.; Li, X.; Caricato, M.; Marenich, A.; Bloino, J.; Janesko, B. G.; Gomperts, R.; Mennucci, B.; Hratchian, H. P.; Ortiz, J. V.; Izmaylov, A. F.; Sonnenberg, J. L.; Williams-Young, D.; Ding, F.; Lipparini, F.; Egidi, F.; Goings, J.; Peng, B.; Petrone, A.; Henderson, T.; Ranasinghe, D.; Zakrzewski, V. G.; Gao, J.; Rega, N.; Zheng, G.; Liang, W.; Hada, M.; Ehara, M.; Toyota, K.; Fukuda, R.; Hasegawa, J.; Ishida, M.; Nakajima, T.; Honda, Y.; Kitao, O.; Nakai, H.; Vreven, T.; Throssell, K.; Montgomery, J. A., Jr.; Peralta, J. E.; Ogliaro, F.; Bearpark, M.; Heyd, J. J.; Brothers, E.; Kudin, K. N.; Staroverov, V. N.; Keith, T.; Kobayashi, R.; Normand, J.; Raghavachari, K.; Rendell, A.; Burant, J. C.; Iyengar, S. S.; Tomasi, J.; Cossi, M.; Millam, J. M.; Klene, M.; Adamo, C.; Cammi, R.; Ochterski, J. W.; Martin, R. L.; Morokuma, K.; Farkas, O.; Foresman, J. B.; Fox, D. J. *Gaussian 09*, revision E.01; Gaussian, Inc.: Wallingford, CT, 2016.

<sup>10</sup> (a) A. D. Becke, *J. Chem. Phys.*, 1993, **98**, 5648–5652; (b) C. Lee, W. Yang and R. G. Parr, *Phys. Rev. B: Condens. Matter Mater. Phys.*, 1988, **37**, 785–789; (c) B. Miehlich, A. Savin, H. Stoll and H. Preuss, *Chem. Phys. Lett.*, 1989, **157**, 200–206.

<sup>11</sup> S. Grimme, S. Ehrlich and L. Goerigk, *J. Comput. Chem.*, 2011, **32**, 1456–1465.

<sup>12</sup> (a) F. Weigend and R. Ahlrichs, *Phys. Chem. Chem. Phys.*, 2005, **7**, 3297–3305; (b) F. Weigend, *Phys. Chem. Chem. Phys.*, 2006, **8**, 1057–1065.

<sup>13</sup> A. V. Marenich, C. J. Cramer and D. G. Truhlar, *J. Phys. Chem. B*, 2009, **113**, 6378–6396.

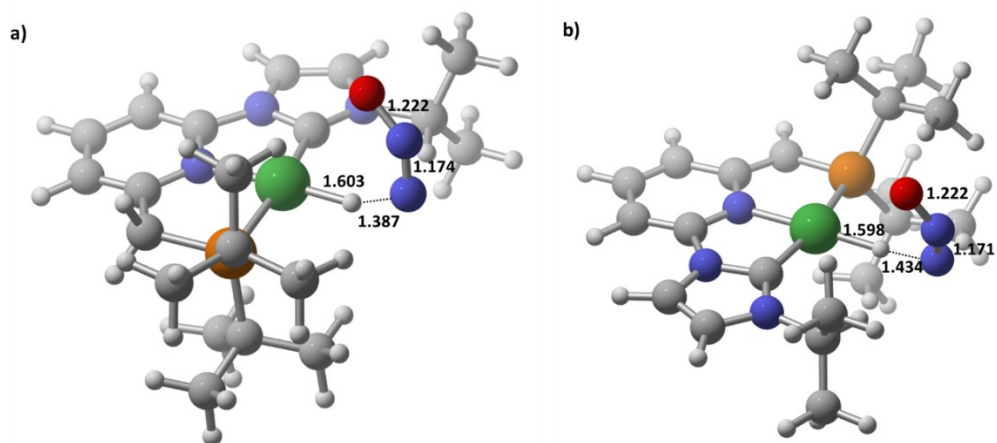

**Figure S36.** Views of the DFT-optimized geometries of the transition states **TS(3a→A)** (a) and **TS(4a→A\*)** (b).

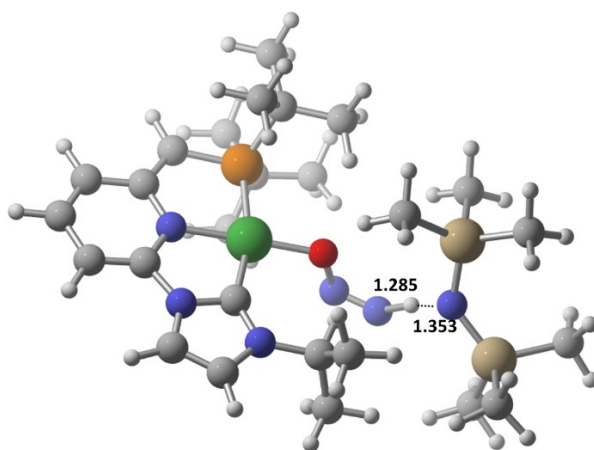

**Figure S37.** View of the DFT-optimized geometry of the transition state **TS(A\*→C\*)**.

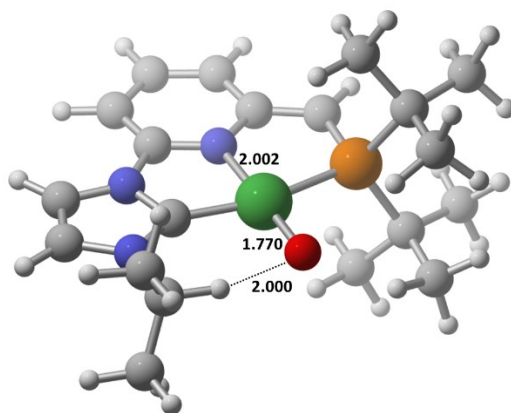

**Figure S38.** View of the DFT-optimized geometry of **C\***.



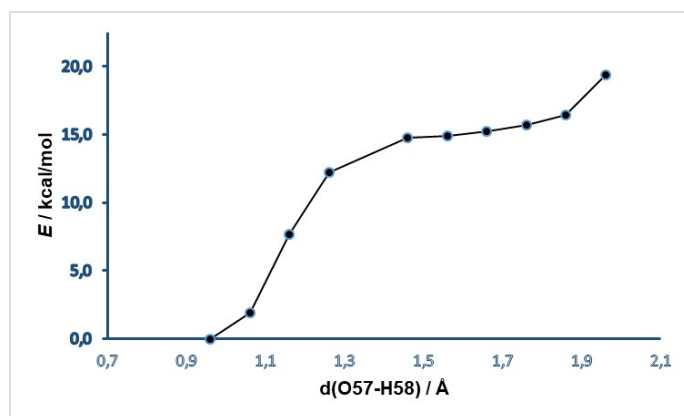

**Figure S39.** Potential energy scan (PES) of the reaction coordinate O57-H58 of the reaction of **C\*** (+ (TMS)<sub>2</sub>NH) to **5a** (+ (TMS)<sub>2</sub>N<sup>•</sup>).
